1 **TITLE: Multivalent interactions drive the *Toxoplasma* AC9:AC10:ERK7 complex to**  
2 **concentrate ERK7 in the apical cap**

3

4 **RUNNING TITLE: Essential interactions govern apical cap function**

5

6 **KEYWORDS: *Toxoplasma gondii*, inner membrane complex, apical complex,**  
7 **protein-protein interactions, multivalent interactions**

8

9 **AUTHORS: Peter S. Back<sup>1\*</sup>, William J. O'Shaughnessy<sup>2\*</sup>, Andy S. Moon<sup>3</sup>, Pravin S.**  
10 **Dewangan<sup>2</sup>, Michael L. Reese<sup>2,4+</sup>, Peter J. Bradley<sup>1,3+</sup>**

11 *<sup>1</sup>Molecular Biology Institute, University of California, Los Angeles, CA 90095*

12 *<sup>2</sup>Department of Pharmacology, University of Texas Southwestern Medical Center,*  
13 *Dallas, TX 75390*

14 *<sup>3</sup>Department of Microbiology, Immunology, and Molecular Genetics, University of*  
15 *California, Los Angeles, CA 90095*

16 *<sup>4</sup>Department of Biochemistry, University of Texas Southwestern Medical Center,*  
17 *Dallas, TX 75390*

18

19 \*P.S.B. and W.J.O. contributed equally to this work.

20 +P.J.B. and M.L.R. are co-principal investigators for this work.

21

22 **CORRESPONDENCE: pbradley@ucla.edu or michael.reese@utsouthwestern.edu**

23

24 **ABSTRACT**

25 The *Toxoplasma* inner membrane complex (IMC) is a specialized organelle that is crucial  
26 for the parasite to establish an intracellular lifestyle and ultimately cause disease. The  
27 IMC is composed of both membrane and cytoskeletal components, further delineated into  
28 the apical cap, body, and basal subcompartments. The apical cap cytoskeleton was  
29 recently demonstrated to govern the stability of the apical complex, which controls  
30 parasite motility, invasion, and egress. While this role was determined by individually  
31 assessing the apical cap proteins AC9, AC10, and the MAP kinase ERK7, how the three  
32 proteins collaborate to stabilize the apical complex is unknown. In this study, we use a  
33 combination of deletion analyses and yeast-2-hybrid experiments to establish that these  
34 proteins form an essential complex in the apical cap. We show that AC10 is a foundational  
35 component of the AC10:AC9:ERK7 complex and demonstrate that the interactions  
36 among them are critical to maintain the apical complex. Importantly, we identify multiple  
37 independent regions of pairwise interaction between each of the three proteins,  
38 suggesting that the AC9:AC10:ERK7 complex is organized by multivalent interactions.  
39 Together, these data support a model in which multiple interacting domains enable the  
40 oligomerization of the AC9:AC10:ERK7 complex and its assembly into the cytoskeletal  
41 IMC, which serves as a structural scaffold that concentrates ERK7 kinase activity in the  
42 apical cap.

43

44

45

46

47 **IMPORTANCE**

48 The phylum Apicomplexa consists of obligate, intracellular parasites including the  
49 causative agents of toxoplasmosis, malaria, and cryptosporidiosis. Hallmarks of these  
50 parasites are the IMC and the apical complex, both of which are unique structures that  
51 are conserved throughout the phylum and required for parasite survival. The apical cap  
52 portion of the IMC has previously been shown to stabilize the apical complex. Here, we  
53 expand on those studies to determine the precise protein-protein interactions of the apical  
54 cap complex that confer this essential function. We describe the multivalent nature of  
55 these interactions and show that the resulting protein oligomers likely tether ERK7 in the  
56 apical cap. This study represents the first description of the architecture of the apical cap  
57 at a molecular level, expanding our understanding of the unique cell biology that drives  
58 *Toxoplasma* infections.

59

60

61

62

63

64

65

66

67

68

69

## 70 INTRODUCTION

71 The phylum Apicomplexa contains a large group of obligate intracellular parasites  
72 of medical and veterinary importance (1). Human parasites include *Toxoplasma gondii*,  
73 which causes toxoplasmosis in immunocompromised people and congenitally infected  
74 neonates; *Plasmodium* spp., which causes malaria; and *Cryptosporidium* spp., which  
75 causes diarrheal disease in children (2–4). Important animal pathogens include *Neospora*  
76 spp., *Eimeria* spp., *Theileria* spp., and *Babesia* spp., which together account for  
77 enormous economic losses in the poultry and cattle industries (5–7). These apicomplexan  
78 parasites require specialized machinery to actively invade their mammalian host cells,  
79 establish an intracellular niche, and cause disease. The alveoli are one such structure  
80 and are formed from a series of flattened membranous vesicles that underlies the plasma  
81 membrane. The alveoli represent a hallmark of the broader superphylum Alveolata that  
82 includes ciliates, dinoflagellates, and apicomplexan parasites (8).

83 In apicomplexans, the alveoli are called the inner membrane complex (IMC). The  
84 IMC is a peripheral membrane system with two well described roles: a platform to anchor  
85 the glideosome, the actin-myosin motor complex that interacts with micronemal adhesins  
86 secreted onto the parasite surface for gliding motility, and a scaffold for endodyogeny, an  
87 internal budding process of replication (9, 10). The IMC is situated between the plasma  
88 membrane and cortical microtubules at the periphery of the cell and consists of a series  
89 of flattened membrane vesicles and an underlying cytoskeletal network of intermediate  
90 filament-like proteins called the alveolins (11, 12). The membrane vesicles are organized  
91 into rectangular plates along the body of the parasite, culminating in a single cone-shaped  
92 plate at the apex called the apical cap (13, 14). Because both the apical cap and body

93 sections of the IMC are composed of similar membrane and cytoskeletal components,  
94 they were previously believed to be one unified structure. However, the discovery of an  
95 array of new IMC proteins revealed that the apical cap contains a unique cohort of  
96 proteins, suggesting a specialized function for this region (15–20). Recent analyses of a  
97 group of these proteins revealed a third IMC function – regulating the biogenesis and  
98 stability of the apical complex (21–23).

99         The apical complex is a group of cytoskeletal structures at the apex of the parasite  
100 that includes the microtubule-based conoid, the flanking apical polar ring (APR), and two  
101 preconoidal rings (19, 24, 25). The striking basket-shaped ultrastructure of the conoid  
102 allowed it to be readily described in the tissue cyst-forming coccidian subgroup of the  
103 Apicomplexa (e.g. *Toxoplasma*, *Sarcocystis*, *Eimeria*). Remarkably, the apical complex,  
104 including the conoid, has been described in early-branching alveolates that are not  
105 members of Apicomplexa, suggesting the structure is more ancient than originally  
106 appreciated (26, 27). Indeed, while the conoid was originally presumed to be missing from  
107 Haemosporidia (1, 28), recent studies have identified a reduced conoid complex in  
108 multiple stages of *Plasmodium*, suggesting that this structure is conserved throughout the  
109 Apicomplexa (29–31). Moreover, the apical complex contains orthologs of cilium-  
110 associated proteins, leading to a potential link between the apical complex of  
111 apicomplexan parasites and more typical eukaryotic cilia (29, 32–35). Numerous studies  
112 have demonstrated that the apical complex regulates the secretion of specialized  
113 organelles called micronemes and rhoptries, which govern parasite motility, attachment,  
114 invasion, and egress (36). While the trigger for rhoptry secretion at the apical complex is  
115 unknown, calcium signaling cascades have been shown to coordinate both microneme

116 secretion and conoid extrusion, suggesting a connection between the two activities (37).  
117 The conoid has also been implicated in initiating motility via several calmodulin-like  
118 proteins, the myosin motor protein MyoH, and the essential formin protein FRM1 (38–40).  
119 In addition, several APR-localizing proteins were shown to be important in controlling  
120 microneme release, indicating that these flanking cytoskeletal structures also contribute  
121 to the function of the apical complex (19, 41, 42).

122         While the molecular composition and function of the apical complex is becoming  
123 clearer, how it is formed and maintained is largely a mystery. Recently, three apical cap  
124 proteins (AC9, AC10, and ERK7) were identified as essential for the maturation of the  
125 apical complex (21–23). Depleting any one of these proteins eliminates the conoid in  
126 mature parasites, resulting in a complete block in motility, invasion, and egress.  
127 Importantly, AC9 was shown to accomplish this by recruiting the conserved MAP kinase  
128 ERK7 to the apical cap and regulating its kinase activity (23). Thus, it is evident that AC9,  
129 AC10, and ERK7 work in conjunction to facilitate the apical complex maturation and  
130 function. However, how these proteins interact and coordinate at the apical cap to confer  
131 their functions remains unknown. In this study, we explore the organization and  
132 mechanism of this essential protein complex. We show that AC10 recruits both AC9 and  
133 ERK7 to the apical cap, suggesting it is the anchor for the complex. We combine yeast-  
134 2-hybrid experiments to examine direct pairwise interactions with deletion analyses in  
135 parasites to assess the functional importance of these interactions. Through these  
136 experiments, we reveal multiple domains in AC9 and AC10 that are critical for assembling  
137 the complex at the apical cap and for the maturation of the conoid. Importantly, we show  
138 that these domains mediate independent pairwise interactions between AC9, AC10, and

139 ERK7. Thus, we propose that these multimeric interactions drive the oligomerization of  
140 the AC9:AC10:ERK7 complex into the apical cap cytoskeleton, which tethers ERK7 to the  
141 site of its essential function in coordinating the proper biogenesis of the apical complex.

142

## 143 **RESULTS**

### 144 **AC10 is essential for recruitment of the AC9:AC10:ERK7 complex to the apical cap.**

145 While AC9, AC10 and ERK7 were recently shown to be essential for apical  
146 complex assembly and stabilization (21–23), the interactions between the three proteins  
147 and how they are organized in the apical cap remain poorly understood (an overview of  
148 these proteins is shown in Fig. 1). To explore their interactions, we generated parasites  
149 with AC10 tagged with an auxin-inducible degron fused to 3xHA, AC9 tagged with 3xMyc,  
150 and ERK7 tagged with 3xTy (triple-tagged: AC10<sup>AID-3xHA</sup>/AC9<sup>3xMyc</sup>/ERK7<sup>3xTy</sup>). As shown  
151 previously, the AC10<sup>AID-3xHA</sup> fusion protein targets correctly to the apical cap, degrades  
152 efficiently upon addition of auxin (IAA), and results in the loss of AC9 from the apical cap  
153 (Fig. 2A and B) (22). Our triple-tagged parasites allowed us to additionally demonstrate  
154 that AC10<sup>AID-3xHA</sup> knockdown removes ERK7 from the apical cap though its cytoplasmic  
155 staining is retained (Fig. 2B). We used line intensity scans to quantify the levels of ERK7  
156 at the apical cap versus the bulk cytosol, which clearly demonstrated a loss in  
157 concentrated apical cap signal upon AC10 knockdown (Fig. S2). Consistent with the AC9  
158 and ERK7 staining patterns, western blot analyses showed that AC9 is predominantly  
159 degraded while ERK7 levels appear to remain stable (Fig. 2C) (22). In agreement with  
160 previous studies (22), depletion of AC10 results in the elimination of the conoid (Fig. 2D),  
161 which is lethal for the parasites (Fig. 2E), as it renders them immotile and noninvasive. In

162 addition, we confirmed that the knockdown of AC9 does not affect the localization of AC10  
163 (Fig. 2F) (22), indicating that AC10 does not rely on AC9 for apical cap localization. These  
164 results demonstrate that AC10 is essential for recruiting both AC9 and ERK7 to the apical  
165 cap and suggest that AC10 is the foundational component of the AC9:AC10:ERK7  
166 complex.

167

### 168 **AC9 is recruited to the apical cap through a direct interaction with AC10.**

169 Like most IMC components, AC9 and AC10 lack significant homology to other  
170 proteins. Both proteins contain large stretches of predicted intrinsic disorder, as well as  
171 predicted coiled-coil (CC) domains towards their N-termini (Fig. 1A and B). In addition,  
172 we previously identified a well-conserved sequence in the AC9 C-terminus that is required  
173 to recruit ERK7 to the apical cap and acts as a competitive inhibitor of ERK7 kinase  
174 activity by occupying both the kinase scaffolding and active sites (23). Since AC10 likely  
175 recruits AC9 to the apical cap, we reasoned that the AC9 CC domain may be required for  
176 this interaction. In the background of our AC9<sup>AID-3xHA</sup> strain (23), we expressed a second-  
177 copy of AC9 driven by the ISC6 promoter and targeted to the UPRT locus (AC9<sup>wt</sup>, Fig. 3A  
178 and B) (43). As expected, expression of AC9<sup>wt</sup> rescued the AC9<sup>AID-3xHA</sup> knockdown  
179 phenotype, as assessed by SAS6L staining of the conoid and plaque assay (Fig. 3C-E).  
180 We also created a strain expressing AC9 in which the core of the predicted CC domain  
181 had been deleted (residues  $\Delta$ 75-113, AC9<sup>ACC</sup>, Fig. 3F). Consistent with the high  
182 conservation of this region (Fig. 1A), AC9<sup>ACC</sup> was not correctly targeted to the apical cap  
183 and thus it was unable to rescue the effects of AC9<sup>AID-3xHA</sup> degradation (Fig. 3G-I).  
184 Because AC9<sup>ACC</sup> staining was faint, we assessed its stability by western blot and found



185 that it is expressed at the appropriate size, but its protein level is greatly diminished (Fig.  
186 S3A). This low level of AC9<sup>ΔCC</sup> is likely the result of turnover upon loss of binding to its  
187 partner AC10 as loss of AC9 is also seen following AC10<sup>AID</sup> knockdown (Fig. 2C).

188 While we and others have demonstrated a potential interaction between AC9 and  
189 AC10 through proximity biotinylation (22, 23), this interaction may either be direct or  
190 through an intermediate protein. To test whether AC9 directly binds AC10, we used a  
191 yeast-2-hybrid (Y2H) system in which stable interactions drive the expression of the HIS3  
192 marker. Full-length AC9 was expressed as an N-terminal fusion with the LexA DNA  
193 binding domain and AC10 was expressed as an N-terminal fusion with the GAL4  
194 activating domain. As AC10 is a large protein of 1979 residues, we split the protein in  
195 thirds and tested each portion for activation: AC10<sup>A</sup> containing residues 2-650, AC10<sup>B</sup>  
196 containing residues 651-1300, AC10<sup>C</sup> containing residues 1301-1979 (Fig. 1B).  
197 Intriguingly, we found that AC9 interacts with two independent regions of AC10, robustly  
198 binding both AC10<sup>A</sup> and AC10<sup>B</sup>; however, we observed no growth in restrictive conditions  
199 with the C-terminal AC10<sup>C</sup> region (Fig. 3J, an overview of all Y2H data is shown in Table  
200 1). These data suggest AC10<sup>C</sup> does not bind AC9, though we cannot rule out that AC10<sup>C</sup>  
201 is not stable in yeast and is therefore unavailable for binding.

202 To test whether the AC9 CC domain was required for this interaction, we deleted  
203 this region from the full length Y2H construct (AC9<sup>ΔCC</sup>). Consistent with its inability to  
204 rescue the AC9<sup>AID-3xHA</sup> knockdown phenotype in parasites, AC9<sup>ΔCC</sup> was unable to bind  
205 either AC10<sup>A</sup> or AC10<sup>B</sup> (Fig. 3K). Moreover, the AC9 CC domain alone was sufficient to  
206 bind AC10<sup>A</sup> in the Y2H assay, though it could not interact with AC10<sup>B</sup>. The α-helical region  
207 of AC9 C-terminal to the predicted CC is one of the more highly conserved areas in the

208 protein (Fig. 1A). We therefore extended our Y2H construct to include this region (AC9<sup>70-</sup>  
209 <sup>157</sup>), which now robustly interacted with both AC10<sup>A</sup> and AC10<sup>B</sup> (Fig. 3K). Taken together,  
210 these data demonstrate that the conserved  $\alpha$ -helical sequence containing the predicted  
211 AC9 CC domain is driving interaction with at least two independent sites on AC10, and  
212 these interactions are required for forming the functional ternary complex in the apical  
213 cap.

214

215 **The N-terminal third of AC10 binds both AC9 and ERK7 and is required for efficient**  
216 **recruitment of ERK7 to the apical cap.**

217 As AC9<sup>CC</sup> binds AC10 at multiple distinct sites within the first two thirds of the  
218 protein (Fig. 3J), we sought to further delineate which regions of AC10 are required for  
219 this interaction. Since AC10<sup>A</sup> encompasses the most conserved stretch of residues in  
220 AC10 and includes a predicted CC domain (Fig. 1B), we generated a Y2H construct in  
221 which CC1 was deleted from this region (residues  $\Delta$ 422-513, AC10<sup>A( $\Delta$ CC1)</sup>). The Y2H  
222 assay showed that AC10<sup>A( $\Delta$ CC1)</sup> was unable to interact with full-length AC9, demonstrating  
223 that CC1 is necessary for binding (Fig. 4A). AC10<sup>CC1</sup> alone was not, however, sufficient  
224 to bind AC9, suggesting that this region does not form a simple coiled-coil interaction with  
225 AC9 (Fig. 4A).

226 To interrogate the functional domains of AC10 in parasites, we expressed full-  
227 length AC10 fused to a V5 epitope tag driven by its endogenous promoter and targeted  
228 to the UPRT locus (AC10<sup>wt</sup>, Fig. 4B). As expected, the AC10<sup>wt</sup> complementation construct  
229 correctly localized to the apical cap (Fig. 4C), fully rescued the plaque defect (Fig. 4D),  
230 properly recruited both AC9 and ERK7 (Fig. 4E), and restored SAS6L staining to the

231 conoid upon AC10<sup>AID-3xHA</sup> degradation (Fig. 4F). Thus, this complementation system  
232 serves as a platform to assess the functional domains of AC10.

233 To assess the role of AC10<sup>CC1</sup> in parasites, we deleted CC1 from the full-length  
234 construct (AC10<sup>ΔCC1</sup>) and expressed it in the AC10<sup>AID-3xHA</sup> strain (Fig. 4G). While  
235 AC10<sup>ΔCC1</sup> targeted correctly (Fig. 4H), this complemented strain was unable to form  
236 plaques upon AC10<sup>AID-3xHA</sup> degradation, demonstrating that CC1 is essential for AC10  
237 function (Fig. 4I). Consistent with the lack of plaque formation, AC10<sup>ΔCC1</sup> did not recruit  
238 ERK7 to the apical cap upon AC10<sup>AID-3xHA</sup> degradation (Fig. 4J), resulting in the loss of  
239 SAS6L signal (Fig. 4K). However, we still observed AC9 recruitment in AC10<sup>ΔCC1</sup>  
240 parasites upon AC10<sup>AID-3xHA</sup> degradation (Fig. 4J). This observation was surprising as we  
241 have previously shown that the AC9 C-terminus forms a tight interaction with ERK7 and  
242 is required for its recruitment to the apical cap (23). These data suggest that AC10<sup>CC1</sup>  
243 may also directly bind ERK7 independently of the AC10 recruitment of AC9 to the apical  
244 cap.

245 We tested this hypothesis using our Y2H assay and found that AC10<sup>A</sup> was indeed  
246 able to bind the ERK7 kinase domain (Fig. 5). In contrast to the interaction with AC9, in  
247 which AC10<sup>CC1</sup> was required, we found that AC10<sup>A(ΔCC1)</sup> was still able to bind ERK7 in the  
248 Y2H assay, though the interaction was attenuated. In addition to AC10<sup>A</sup> interacting with  
249 the ERK7 kinase domain, we were surprised to find that AC10<sup>B</sup> also interacted with the  
250 intrinsically disordered C-terminus of ERK7, suggesting that ERK7 forms multivalent  
251 interactions with AC10. Thus, the Y2H and functional data indicate that multiple AC10  
252 regions mediate interactions with both AC9 (Fig. 3, 4) and ERK7 (Fig. 5). Among these  
253 interactions, AC10<sup>CC1</sup> is required for the efficient recruitment of ERK7 to the apical cap

254 independently of AC9, and this interaction is essential for the formation of the mature  
255 conoid.

256

257 **A short, conserved sequence in AC10 is essential to bind and recruit AC9 to the**  
258 **apical cap.**

259 Because the AC10<sup>ΔCC1</sup> strain was still able to recruit AC9 to the apical cap, we  
260 sought to identify additional regions in AC10 that are required for AC9 recruitment. Our  
261 Y2H experiments identified regions in AC10<sup>B</sup> that independently bound AC9 (Fig. 3J). To  
262 identify a minimal region that was sufficient for AC9 binding, we focused on a short,  
263 conserved sequence within AC10<sup>B</sup> that is predicted to form an α-helix (Fig. 1B) and has  
264 a heptad repeat similar to that seen in coiled-coil domains (Fig. 6A). Y2H analysis showed  
265 that residues 651-683 were sufficient to robustly interact with AC9 (Fig. 6B), leading us  
266 to label this region as the AC9 binding domain (AC10<sup>AC9-BD</sup>). To test the importance of  
267 this region for AC10 function in parasites, we complemented the AC10<sup>AID-3xHA</sup> strain with  
268 a construct in which the AC9-BD had been deleted (AC10<sup>Δ(AC9-BD)</sup>, Fig. 6C). We found  
269 that while the truncated protein localized properly to the apical cap (Fig. 6D), it was unable  
270 to rescue the plaque defect upon AC10<sup>AID-3xHA</sup> knockdown (Fig. 6E). We also observed  
271 that both AC9 and ERK7 were absent in the apical cap upon AC10<sup>AID-3xHA</sup> degradation  
272 (Fig. 6F), resulting in the loss of the conoid (Fig. 6G). These results suggest that AC10<sup>AC9-</sup>  
273 <sup>BD</sup> likely forms a short coiled-coil with AC9<sup>CC</sup>, and this interaction is absolutely required  
274 for recruitment of the AC9:ERK7 complex to the apical cap in parasites.

275

276 **A third AC9 binding site on AC10 is required for full parasite fitness.**

277 While AC10<sup>AC9-BD</sup> was sufficient to bind AC9 in our Y2H assay (Fig. 6B), AC10<sup>B</sup>  
278 also contains the second predicted CC domain spanning residues 781-830 (Fig. 1B, 7A).  
279 To assess the importance of CC2, we first generated a construct with the AC9-BD deleted  
280 from AC10<sup>B</sup> (AC10<sup>684-1300</sup>) and found that this region still interacted with AC9 (Fig. 7A).  
281 We then deleted CC2 from AC10<sup>684-1300</sup> (AC10<sup>684-1300,ΔCC2</sup>), which resulted in a somewhat  
282 attenuated interaction with AC9 in our Y2H assay. We additionally found that a portion of  
283 AC10<sup>B</sup> containing CC2 (AC10<sup>684-913</sup>) is not sufficient for interacting with AC9. These Y2H  
284 results suggest that CC2 may contain minor AC9 binding regions and that the remaining  
285 residues in AC10<sup>B</sup> likely provide additional binding sites, further supporting the hypothesis  
286 that AC9 and AC10 interact via multiple contact points.

287 We then asked whether deletion of CC2 in the context of an otherwise full-length  
288 protein would affect AC10 function in parasites. We generated AC10<sup>ΔCC2</sup> (residues Δ781-  
289 830) and expressed it in the triple-tagged AC10<sup>AID-3xHA</sup> line (Fig. 7B). As with our other  
290 deletion constructs, AC10<sup>ΔCC2</sup> protein localized correctly to the apical cap (Fig. 7C). Upon  
291 degradation of AC10<sup>AID-3xHA</sup>, AC10<sup>ΔCC2</sup> mostly rescued parasite fitness in a plaque assay,  
292 with a small but reproducible 15% reduction in plaque size (Fig. 7D). Consistent with this  
293 minor impact on the lytic cycle, both AC9 and ERK7 localizations were unaffected (Fig.  
294 7E) and the conoid appeared intact (Fig. 7F). These data suggest that binding of AC9  
295 and other potential interactors at this site, while not required for full parasite fitness, is still  
296 functionally relevant.

297

298 **AC10 N- and C-terminal deletions reveal additional domains for full apical cap**  
299 **function.**

300           The functional regions of AC10 described above only occupy about half of the  
301 1979-residue protein. Notably, AC10 orthologs in other Sarcocystidae are of varying  
302 length and display low sequence identity through the majority of the protein (Fig. 1B). To  
303 determine if the remainder of the protein harbored any additional regions important for  
304 function, we first deleted the N-terminal region of AC10 up to 36 residues N-terminal to  
305 AC10<sup>CC1</sup> (residues 387-1979, AC10<sup>ΔN-term</sup>, Fig. 8A). The AC10<sup>ΔN-term</sup> protein localized  
306 properly to the apical cap independently of AC10<sup>AID-3xHA</sup> degradation (Fig. 8B). Upon  
307 AC10<sup>AID-3xHA</sup> depletion, parasites with AC10<sup>ΔN-term</sup> displayed a substantial fitness defect  
308 by plaque assay (48% reduction in plaque size, Fig. 8C). However, AC10<sup>ΔN-term</sup> appears  
309 to be sufficient for recruiting both AC9 and ERK7 to the apical cap (Fig. 8D), resulting in  
310 the presence of a conoid as demonstrated by apical SAS6L staining (Fig. 8E). Thus, while  
311 this N-terminal region is not strictly required for recruiting AC9:ERK7 and maturation of  
312 the conoid, its deletion reduces parasite fitness, indicating that this region is important for  
313 full AC10 function.

314           We next focused on the C-terminal region of AC10. Due to the lack of identifiable  
315 features in this region, we deleted the C-terminal half of the protein, which includes AC10<sup>C</sup>  
316 plus the portion of AC10<sup>B</sup> C-terminal to the CC domains (residues Δ914-1979, AC10<sup>ΔC-</sup>  
317 <sup>term</sup>, Fig. 9A). Upon examining the localization of AC10<sup>ΔC-term</sup>, we noticed striking, cell-  
318 cycle dependent variation. In mature parasites, AC10<sup>ΔC-term</sup> localized to the apical cap  
319 regardless of AC10<sup>AID-3xHA</sup> depletion (Fig. 9B). However, in budding parasites, AC10<sup>ΔC-</sup>  
320 <sup>term</sup> was largely absent in the maternal apical cap while remaining intact in the daughter  
321 buds (Fig. 9C). We thus assessed the localization of AC9 and ERK7 in mature parasites  
322 expressing AC10<sup>ΔC-term</sup> and found that only a small amount of AC9 could be detected in

323 the apical cap upon AC10<sup>AID-3xHA</sup> knockdown (Fig. 9D). ERK7 also appeared to be  
324 dramatically diminished from the apical cap in mature parasites (Fig. 9D). In budding  
325 parasites, while both AC9 and ERK7 were drastically reduced in mature apical caps, the  
326 signal appeared largely intact in daughter buds, similar to the localization of AC10<sup>ΔC-term</sup>  
327 (Fig. 9E). Somewhat surprisingly, despite these substantial localization defects, the  
328 conoid still appeared to be intact by SAS6L staining, suggesting that the amounts of AC9,  
329 AC10<sup>ΔC-term</sup>, and ERK7 in the apical cap are sufficient to stabilize the conoid (Fig. 9F).  
330 Nevertheless, plaque assays revealed that parasites expressing AC10<sup>ΔC-term</sup> suffered a  
331 severe defect in parasite fitness upon AC10<sup>AID-3xHA</sup> degradation (85% reduction in plaque  
332 size; Fig. 9G).

333 We next sought to determine whether the C-terminal half of AC10 described above  
334 binds directly to AC9. We created a Y2H construct spanning AC10 residues 914-1300 to  
335 interrogate the C-terminal portion of AC10<sup>B</sup> (AC10<sup>914-1300</sup>, Fig. 9H). Despite the defects in  
336 AC9 and ERK7 recruitment in AC10<sup>ΔC-term</sup> parasites, we found that neither AC10<sup>914-1300</sup>  
337 (Fig. 9I) nor the remainder of the AC10 C-terminus (AC10<sup>C</sup>) interacts with AC9 (Fig. 3J).  
338 Together, these results suggest that while the AC10 C-terminus does not directly interact  
339 with AC9, it contains important regions for maintaining the integrity of the  
340 AC9:AC10:ERK7 complex.

341 Since deletion of either the N- or C-termini of AC10 only partially disrupted function,  
342 we assessed whether the combination of these regions is essential by deleting both  
343 regions simultaneously (residues Δ2-337 and Δ914-1979, AC10<sup>ΔN/C</sup>, Fig. 10A). As with  
344 AC10<sup>ΔC-term</sup>, AC10<sup>ΔN/C</sup> localized properly in mature parasites (Fig. 10B), and during  
345 replication, the signal was diminished specifically in maternal apical caps upon addition

346 of auxin (Fig. 10C). Unlike AC10<sup>ΔC-term</sup>, however, this construct could not rescue the  
347 plaque defect at all (Fig. 10D). Western blot analysis demonstrated that the difference  
348 between AC10<sup>ΔC-term</sup> and AC10<sup>ΔN/C</sup> does not appear to be due to expression levels (Fig.  
349 S3B). Consistent with the complete loss-of-function of AC10<sup>ΔN/C</sup>, both AC9 and ERK7  
350 were absent from the maternal apical caps of both mature and budding parasites (Fig.  
351 10E and F). In addition, we observed reduced AC9 and ERK7 signal in the apical caps of  
352 daughter buds (Fig. 10F). In agreement with the lack of ability to form plaques, AC10<sup>ΔN/C</sup>  
353 parasites were completely missing apical SAS6L staining upon AC10<sup>AID-3xHA</sup> depletion  
354 (Fig. 10G). Together, these results demonstrate that the cumulative effect of deleting both  
355 N- and C-terminal regions renders AC10 nonfunctional.

356

### 357 **AC10 effectively competes with AC9 as an ERK7 substrate.**

358 Because AC10 binds both AC9 and ERK7 (Fig. 4, Fig. 5, Fig 6), and ERK7  
359 localization (23) and kinase activity (21) are both essential for a functional conoid, we  
360 asked whether AC10 may be phosphorylated by ERK7. Notably, AC10 has 396  
361 phosphorylatable residues (Ser/Thr) and 57 of these residues have been identified as  
362 phosphorylated in parasites in published phosphoproteomics datasets (47), including 10  
363 high probability MAPK sites spread throughout the AC10 sequence. We created a  
364 bacterial expression construct of the N-terminal region of AC10 that is bound by both AC9  
365 and ERK7. We found that this recombinantly expressed and purified AC10 was robustly  
366 phosphorylated by ERK7 (Fig. 11). Remarkably, the AC10 protein was phosphorylated to  
367 a much greater degree than myelin basic protein (MBP), a typical generic substrate used  
368 to test MAPK activity (48).



369 We previously demonstrated that AC9 binds ERK7 with an approximate 20 nM  $K_D$   
370 and robustly inhibits ERK7 activity (23). This led us to propose a model by which AC9  
371 increases the specificity of ERK7 for its substrates, as true substrates must not only bind  
372 the active site, but also compete with AC9 for scaffolding interaction. We therefore tested  
373 whether the AC10 interaction with ERK7 is able to overcome inhibition by the AC9<sup>418-452</sup>  
374 peptide (Fig. 11). As expected, addition of equimolar AC9<sup>418-452</sup> to the kinase reaction  
375 completely blocks MBP phosphorylation by ERK7. We found, however, that AC10  
376 phosphorylation is undiminished by the addition of AC9. Furthermore, when we included  
377 equimolar AC9, AC10, and MBP in the kinase reaction, we saw that MBP phosphorylation  
378 was still fully inhibited, while AC10 was still robustly phosphorylated. These data strongly  
379 suggest AC10 is a legitimate substrate of ERK7, and that one function of ERK7 kinase  
380 activity may be to regulate the conformation and assembly of the AC10 complex.

381

## 382 **DISCUSSION**

383 In this study, we explore the organization and function of the AC9:AC10:ERK7  
384 ternary complex. We demonstrated that both AC9 and ERK7 are dependent on AC10 to  
385 be recruited to the apical cap, suggesting that AC10 is an anchor for the complex.  
386 However, it remains unclear how AC10 itself is targeted to the apical cap. One possibility  
387 is that other apical cap proteins recruit AC10. Similar to AC10, six of the known apical  
388 cap proteins (AC2, AC3, AC4, AC5, AC7, AC8) are associated with the IMC cytoskeletal  
389 network (15). Unlike AC9 and AC10, these other apical cap proteins were predicted to be  
390 dispensable based on a genome-wide CRISPR screen (49). Thus, it is possible that these  
391 apical cap proteins play redundant roles in organizing the AC9:AC10:ERK7 complex. It is

392 also possible that there are undiscovered components of this protein complex or ones  
393 that serve to tether AC10 to the apical cap.

394 To determine how AC9, AC10, and ERK7 interact, we focused on identifiable  
395 domains using a combination of pairwise Y2H (Table 1) and complementation assays to  
396 assess direct binding and functional relevance. AC10 appears to recruit AC9 (Fig. 2) (22),  
397 which in turn recruits ERK7 through a conserved C-terminal motif that serves to both  
398 concentrate ERK7 at the apical cap and regulate its kinase activity (23). Our Y2H and  
399 complementation assays revealed a conserved helical sequence at the AC9 N-terminus  
400 that was both necessary and sufficient to bind AC10 and was required for AC9's  
401 localization at the apical cap (Fig. 2). Remarkably, this single region of AC9 was able to  
402 bind multiple sites on AC10 (Fig. 3-7). In addition, AC10 can independently interact with  
403 both the kinase domain and C-terminal regions of ERK7 (Fig. 5). AC10 therefore seems  
404 to be act as a large scaffolding molecule that recruits multiple copies of each AC9 and  
405 ERK7. Furthermore, combined with the multiple binding sites on AC10 for both AC9 and  
406 ERK7, because each component of the AC9:AC10:ERK7 complex can interact with the  
407 other, it seems likely that AC10 functions to nucleate oligomerization of this complex (Fig.  
408 12). Importantly AC9, AC10, and ERK7 have each been demonstrated to fractionate with  
409 the detergent-insoluble parasite cytoskeleton (21, 22), and their oligomerization is  
410 consistent with the characteristic meshwork of the IMC cytoskeleton. The AC10 binding  
411 region of AC9 is a predicted coiled-coil (AC9<sup>CC</sup>), and we identified two regions of AC10  
412 (AC10<sup>CC1</sup> and AC10<sup>AC9-BD</sup>) with coiled-coil-like properties that are required for AC9  
413 interaction and essential for AC10 function in parasites. Notably, other predicted coiled-

414 coil domains are essential in other IMC proteins (44, 45, 50), suggesting this may be a  
415 general theme of IMC cytoskeleton assembly.

416 Deletion of the short AC10<sup>AC9-BD</sup> sequence blocks AC9 recruitment to the apical  
417 cap in parasites (Fig. 6). However, AC9 localization was largely unperturbed in AC10<sup>ACC1</sup>  
418 parasites while ERK7 was unable to be recruited to the apical cap (Fig. 4). Remarkably,  
419 Y2H revealed that the N-terminal third of AC10 was able to physically interact with both  
420 AC9 and the ERK7 kinase domain, though the AC10<sup>CC1</sup> region itself was only required  
421 for AC9 binding (Fig. 4A, Fig. 5). This differential effect of AC10<sup>ACC1</sup> on AC9 and ERK7  
422 binding to this region suggests that the binding interfaces may occupy different surfaces  
423 of a folded domain. We also found that this N-terminal region of AC10 was robustly  
424 phosphorylated by ERK7 *in vitro* and was unaffected by AC9 inhibition (Fig. 11). Together,  
425 these data indicate that AC10 is an ERK7 substrate in parasites and suggest that its  
426 phosphorylation functions in regulating the assembly of the AC9:AC10:ERK7 complex  
427 into the apical cap cytoskeleton.

428 While AC10 is found throughout coccidia, its length and much of its sequence are  
429 not well conserved (Fig. 1B). Nevertheless, there are stretches of conserved sequence in  
430 the N- and C-terminal regions that are outside of those we identified as critical for  
431 interacting with AC9 and ERK7. We found that neither of these regions of AC10 were  
432 essential to function, though deletion of either reduced parasite fitness (Fig. 8C, 9G).  
433 Notably, AC10<sup>AC-term</sup> parasites showed a fragility of the AC9:AC10:ERK7 complex, in  
434 which the initial recruitment to the apical cap was largely unaffected in daughter cells (Fig.  
435 9C), but the complex appeared disrupted in mature parasites (Fig. 9D, E). While AC10<sup>AC-</sup>  
436 <sup>term</sup> parasites showed a substantial loss of function, the complex was still able to function

437 in facilitating maturation of the conoid (Fig. 9G). In contrast, deletion of both the N- and  
438 C-terminal regions of AC10 rendered the AC9:AC10:ERK7 complex non-functional, as  
439 the daughter conoids were lost (Fig. 10G) and parasites were nonviable (Fig. 10D).  
440 Therefore, it appears that these regions of AC10 either recruit other, undescribed  
441 components of the apical cap cytoskeleton, or form nonessential interactions that facilitate  
442 AC9:AC10:ERK7 oligomerization.

443         This study builds on an increasingly robust body of evidence that the apical cap  
444 acts as an essential platform to facilitate the assembly and maintenance of the apical  
445 complex (21–23). A previously proposed model suggested that AC9 and AC10 act  
446 primarily to stabilize the *Toxoplasma* subpellicular microtubules due to the distribution of  
447 AC9 and AC10 proteins along the longitudinal rows of the microtubules (22). While our  
448 data support the idea that AC9 and AC10 form filaments in the apical cap cytoskeleton,  
449 this model was developed prior to establishing a connection with the MAP kinase ERK7  
450 and its essential role in apical complex maturation (21). We have previously shown that  
451 an AC9 mutant that is unable to recruit ERK7 to the apical cap cannot rescue the AC9  
452 knockdown (23). We have built upon that finding here, demonstrating a loss of the conoid  
453 in mutant AC10 parasites that are able to recruit AC9, but not ERK7, to the apical cap  
454 (Fig. 4J, K). Taken together, our data suggests a different model, in which the ERK7-  
455 dependent phosphorylation of AC10 promotes functional assembly of the  
456 AC9:AC10:ERK7 complex at the apical cap (Fig. 12). It is likely that ERK7 then  
457 phosphorylates other substrates after being recruited at this site, which may include  
458 critical components of the apical complex.

459

## 460 **MATERIALS AND METHODS**

### 461 ***T. gondii* and host cell culture**

462 *T. gondii* RH $\Delta$ ku80 $\Delta$ hxgprt (parental) and subsequent strains were grown on confluent  
463 monolayers of human foreskin fibroblasts (HFFs, ATCC) at 37°C and 5% CO<sub>2</sub> in  
464 Dulbecco's Modified Eagle Medium (DMEM) supplemented with 5% fetal bovine serum  
465 (Gibco), 5% Cosmic calf serum (Hyclone), and 1x penicillin-streptomycin-L-glutamine  
466 (Gibco). Constructs containing selectable markers were selected using 1  $\mu$ M  
467 pyrimethamine (dihydrofolate reductase-thymidylate synthase [DHFR-TS]), 50  $\mu$ g/mL  
468 mycophenolic acid-xanthine (HXGPRT), or 40  $\mu$ M chloramphenicol (CAT) (51–53).  
469 Removal of HXGPRT was negatively selected using 350  $\mu$ g/mL 6-thioxanthine (6-TX),  
470 and homologous recombination to the UPRT locus was negatively selected using 5  $\mu$ M  
471 5-fluorodeoxyuridine (FU DR) (43).

472

### 473 **Antibodies**

474 The HA epitope was detected with mouse monoclonal antibody (mAb) HA.11 (diluted  
475 1:1000) (BioLegend, item no. 901515) or rabbit polyclonal antibody (pAb) anti-HA (diluted  
476 1:1000) (Invitrogen, catalog no. PI715500). The Ty1 epitope was detected with mouse  
477 mAb BB2 (diluted 1:1000) (54). The c-Myc epitope was detected with mouse mAb 9E10  
478 (diluted 1:1000) (55) or rabbit pAb anti-Myc (diluted 1:1000) (Invitrogen, catalog no.  
479 PA1981). The V5 epitope was detected with mouse mAb anti-V5 (diluted 1:1000)  
480 (Invitrogen, catalog no. R96025). *Toxoplasma*-specific antibodies include mouse mAb  
481 m-IMC1 (diluted 1:500) (56), mouse mAb anti-ISP1 (diluted 1:1000) (57), rabbit pAb anti-  
482 IMC6 (diluted 1:2000) (44).

483

#### 484 **Production of IMC12 antibody**

485 The IMC12 coding sequence was cloned into the pET His6 TEV LIC bacterial expression  
486 vector (Scott Gradia, Addgene plasmid #29653) using primers P32-35. The construct was  
487 transformed into BL21(DE3) *E. coli*, and protein was induced with 1 mM IPTG and purified  
488 using Ni-NTA agarose under denaturing conditions as described (58). The sample was  
489 then dialyzed into PBS to remove the urea, and rabbit antisera was produced by Cocalico  
490 Biologicals.

491

#### 492 **Immunofluorescence assay and western blot**

493 Confluent HFF cells were grown on glass coverslips and infected with *T. gondii*.  
494 After 18–24 hours, the coverslips were fixed with 3.7% formaldehyde in PBS and  
495 processed for immunofluorescence (IFA) as described (58). Primary antibodies were  
496 detected by species-specific secondary antibodies conjugated to Alexa Fluor 488/594  
497 (ThermoFisher). Coverslips were mounted in Vectashield (Vector Labs, Burlingame, CA),  
498 viewed with an Axio Imager.Z1 fluorescent microscope (Zeiss), and processed with ZEN  
499 2.3 software (Zeiss). Processing with the ZEN software included deconvolution as well as  
500 adaptation of the magenta pseudocolor from the 594 fluorophore.

501 For western blot, parasites were lysed in 1x Laemmli sample buffer with 100 mM  
502 DTT and boiled at 100°C for 10 minutes. Lysates were resolved by SDS-PAGE and  
503 transferred to nitrocellulose membranes, and proteins were detected with the appropriate  
504 primary antibody and corresponding secondary antibody conjugated to horseradish

505 peroxidase. Chemiluminescence was induced using the SuperSignal West Pico substrate  
506 (Pierce) and imaged on a ChemiDoc XRS+ (Bio-Rad).

507

### 508 **Endogenous epitope tagging**

509 For C-terminal endogenous tagging, a pU6-Universal plasmid containing a protospacer  
510 against the 3' untranslated region (UTR) approximately 100-200 bp downstream of the  
511 stop codon was generated for AC9, AC10, and ERK7, as described previously (59). A  
512 homology-directed repair (HDR) template was PCR amplified using the LIC vectors  
513 p3xHA-mAID.LIC-HXGPRT, p3xMyc.LIC-DHFR, p2xStrep3xTy.LIC-HXGPR that include  
514 the epitope tag, 3' UTR, and a selection cassette (60). The HDR templates include 40 bp  
515 of homology immediately upstream of the stop codon or 40 bp of homology within the 3'  
516 UTR downstream of the CRISPR/Cas9 cut site. This template was amplified in 400  $\mu$ L,  
517 purified by phenol-chloroform extraction, ethanol precipitated, and electroporated into  
518 RH $\Delta$ *hxgprrt* $\Delta$ *ku80* parasites, along with 50  $\mu$ g of the pU6-Universal plasmid. Successful  
519 tagging was confirmed by IFA, and clonal lines of tagged parasites were obtained through  
520 limiting dilution. AC10, AC9, and ERK7 were tagged using CRISPR/Cas9 with primers  
521 P1-P12. This process was followed to generate the triple-tagged parasites (AC10<sup>AID-3xHA</sup>  
522 | AC9<sup>3xMyc</sup> | ERK7<sup>3xTy</sup>).

523

### 524 **Complementation of AC9 and AC10**

525 The AC9 wild-type complementation construct (23) was used as the template for  
526 creating a deletion of the CC domain. The online NEBasechanger  
527 (<https://nebasechanger.neb.com/>) was used to design primers and the Q5 Site Directed

528 Mutagenesis Kit (NEB) was used to generate pUPRTKO-ISC6pro-AC9<sup>ΔCC</sup>-3xTy (primers  
529 P13-14). Both the AC9<sup>wt</sup> and AC9<sup>ΔCC</sup> constructs were linearized with DraIII-HF (NEB),  
530 transfected into AC9<sup>AID-3xHA</sup> parasites along with a universal pU6 that targets the UPRT  
531 coding region, and selected with 5 μg/mL FUDR for replacement of UPRT as described  
532 (43).

533 For AC10, the endogenous promoter as well as the full coding region was PCR  
534 amplified from genomic DNA. This was cloned into the pUPRTKO vector (23) with Gibson  
535 assembly (primers P15-18), resulting in pUPRTKO-AC10pro-AC10<sup>wt</sup>-1xV5. The online  
536 NEBuilder tool was used to design these Gibson primers (<https://nebuilder.neb.com/#/>).  
537 This complementation vector was then linearized with PstI-v2 (NEB), transfected into  
538 triple-tagged parasites, and selected with FUDR. Clones expressing the pUPRTKO-  
539 AC10pro-AC10<sup>wt</sup>-1xV5 vector were screened by IFA, and a V5-positive clone was  
540 designated AC10<sup>wt</sup>. For most of the AC10 deletion constructs, pUPRTKO-AC10pro-  
541 AC10<sup>wt</sup>-1xV5 was used as the template for Q5 Site Directed Mutagenesis Kit (NEB)  
542 (primers P19-28). For AC10<sup>ΔN/C</sup> construct, Gibson assembly was used with pUPRTKO-  
543 AC10pro-AC10<sup>wt</sup>-1xV5 as the template for the vector (primers P29-30) and wildtype  
544 cDNA was used as a template for the insert (primers P31-32). The same processes for  
545 linearization, transfection, and selection as described above were followed for all deletion  
546 constructs.

547

## 548 **Plaque assays**

549 Six-well plates with HFF monolayers were infected with equal numbers of individual  
550 strains grown +/- 500 μM IAA. Plaques were allowed to form for 7 days, fixed with ice-



551 cold methanol, and stained with crystal violet. The areas of 30 plaques per condition were  
552 measured using ZEN software (Zeiss). All plaque assays were performed in triplicate for  
553 each condition. Graphical and statistical analyses were performed using Prism GraphPad  
554 8.0. Multiple two-tailed t-tests were used to compare the SD-centered means of +/- IAA  
555 and statistical significance was determined using the Holm-Sidak method.

556

### 557 **Pairwise yeast-2-hybrid**

558 ERK7 and AC9 sequences were cloned into the pB27 vector (Hybrigenics SA) as N-  
559 terminal fusions with the LexA DNA binding domain by Gibson assembly or enzyme  
560 inverse mutagenesis. AC10 sequences were cloned into the pP6 vector (Hybrigenics SA)  
561 as N-terminal fusions with the GAL4 activating domain. AC9 and AC10 constructs were  
562 created by Gibson assembly using *Toxoplasma* expression constructs as template and  
563 additional truncations were made by enzyme inverse mutagenesis with primers P36-56.  
564 ERK7 truncations were created from a full-length pB27 construct provided by Hybrigenics  
565 using primers P57-58. Synthetic dropout media was purchased from Sunrise Science. To  
566 test for interactions, pairs of constructs were transformed into the L40 strain of *S.*  
567 *cerevisiae* (MATa his3Δ200trp1-901 leu2-3112 ade2 LYS2::(4lexAop-HIS3)  
568 URA3::(8lexAop-lacZ) GAL4; gift of Melanie Cobb). Strains were grown overnight in  
569 permissive (-Leu/-Trp) media, normalized to their OD<sub>600</sub>, and spotted in 5x dilution in both  
570 permissive and restrictive (-Leu/-Trp/-His) media. Relative growth in the two conditions  
571 was assessed after 3-4 days incubation at 30°C.

572

### 573 **Protein expression and purification**

574 All recombinant proteins were expressed as N-terminal fusions to His<sub>6</sub>-SUMO in Rosetta2  
575 (DE3) bacteria overnight at 16°C overnight after induction with 300 mM IPTG. Cells were  
576 resuspended in binding buffer (50 mM Tris, pH 8.6, 500 mM NaCl, 15 mM Imidazole) and  
577 lysed by sonication. His<sub>6</sub>-tagged protein was affinity purified using NINTA resin (Qiagen),  
578 which was washed with binding buffer. Protein was eluted in 20 mM Tris, pH 8.6, 100 mM  
579 NaCl, 150 mM Imidazole. Protein was diluted 1:1 with 20 mM Tris, pH 8.6 and purified by  
580 anion exchange on a HiTrapQ column. For ERK7 kinase and AC9<sup>418-452</sup>, anion exchange  
581 peaks were pooled, incubated with ULP1 protease for 30 min, after which they were  
582 diluted 1:1 in water and the cleaved SUMO separated from the protein of interest by anion  
583 exchange. The flow-through was concentrated and purified by size-exclusion  
584 chromatography, after which it was flash frozen in 10 mM HEPES, pH 7.0, 300 mM NaCl  
585 for storage.

586

### 587 ***In vitro* kinase assay**

588 ERK7 kinase activity was assessed using 1 μM purified ERK7 kinase, 5 mM MgCl<sub>2</sub>, 200  
589 μM cold ATP, 10 mM DTT, 1 mg/mL BSA, 300 mM NaCl, 20 mM HEPES pH 7.0, 10%  
590 glycerol. Reactions were started by adding a hot ATP mix that contained 10 μCi γ[ 32 P]  
591 ATP and 5 μg MBP and/or 10 μM AC10<sup>313-569</sup> as substrate and in the presence or absence  
592 of 10 μM AC9<sup>418-452</sup>. The 25 μL reactions were incubated in a 30°C water bath for 30 min.  
593 Reactions were stopped by adding 5 μL 6x SDS-buffer. 10 μL of each reaction was then  
594 separated by SDS-PAGE. Gels were fixed and coomassie stained and the extent of  
595 phosphorylation was assessed by phosphorimager (GE Typhoon).

596

## 597 **Acknowledgements**

598 We thank Gary Ward for anti-IMC1 antibodies and members of the Reese and Bradley  
599 labs for helpful reading of the manuscript.

600

## 601 **FIGURE LEGENDS**

### 602 **Fig 1. Overview of AC9, AC10, and ERK7 domains.**

603 (A) Diagram of AC9 illustrates a predicted coiled-coil (CC) domain (residues 75-113),  
604 conserved  $\alpha$ -helices flanking the CC domain (residues 113-157), and the ERK7-binding  
605 region (residues 418-452). (B) Diagram of AC10 contains two predicted CC domains  
606 (CC1: 422-513 and CC2: 781-830) as well as a short conserved  $\alpha$ -helix (651-683).  
607 Regions A (2-650), B (651-1300), and C (1301-1979) delineate the divisions of AC10  
608 used for yeast-2-hybrid (Y2H) assays. (C) Diagram of ERK7 showing the kinase domain  
609 (1-358) including the active site (notched region) and the C-terminus (359-692). All three  
610 diagrams contain a grayscale representation of the degree of conservation as well as  
611 secondary structure predictions which are depicted by purple and green bars as noted in  
612 the legend. Conservation calculations are based on multiple sequence alignments of AC9,  
613 AC10, and ERK7 sequences from *T. gondii*, *N. caninum*, *B. besnoitia*, *C. suis*, *E. maxima*,  
614 and *E. tenella*.

615

### 616 **Fig 2. AC10 is an essential component of the apical cap.**

617 (A) Immunofluorescence assay (IFA) of triple-tagged parasites (AC10<sup>AID-3xHA</sup> | AC9<sup>3xMyc</sup> |  
618 ERK7<sup>3xTy</sup>) shows that endogenous AC10<sup>AID-3xHA</sup> co-localizes with the apical cap marker  
619 ISP1 and is efficiently depleted upon addition of IAA (3-indoleacetic acid). Green, rabbit

620 anti-HA; magenta, mouse anti-ISP1. (B) IFA showing that the depletion of AC10<sup>AID-3xHA</sup>  
621 results in the absence of AC9 and the loss of ERK7 from the apical cap. Green, rabbit  
622 anti-Myc; magenta, mouse anti-Ty. (C) Western blot analysis confirms efficient  
623 degradation of AC10<sup>AID-3xHA</sup> and the concomitant nearly complete degradation of AC9  
624 upon AC10<sup>AID-3xHA</sup> knockdown. ERK7 levels are not substantially affected. AC10<sup>AID-3xHA</sup>,  
625 mouse anti-HA; AC9, mouse anti-Myc; ERK7, mouse anti-Ty. Rabbit anti-IMC12 was  
626 used as a loading control and validation of this antibody is shown in Fig. S1. (D) AC10<sup>AID-</sup>  
627 <sup>3xHA</sup> knockdown results in the elimination of the conoid, detected by SAS6L. Green, rabbit  
628 anti-HA; magenta, mouse anti-SAS6L. (E) Representative plaque assay images and  
629 quantification of plaque numbers illustrate a complete loss of plaque formation upon  
630 AC10<sup>AID-3xHA</sup> depletion. (F) Using parasites tagged with AC9<sup>AID-3xHA</sup> and AC10<sup>3xMyc</sup>, IFA  
631 shows that conditional knockdown of AC9 (+IAA) does not affect the localization of AC10.  
632 Green, mouse anti-Myc; magenta, rabbit anti-HA. All scale bars are 2  $\mu$ m.

633

634 **Fig 3. AC9 coiled-coil domain is necessary for localization and function.**

635 (A) Diagram of full-length AC9 driven by the ISC6 promoter and a C-terminal 3xTy epitope  
636 tag. The AC9 CC domains,  $\alpha$ -helices, and the ERK7-binding region are highlighted as in  
637 Fig. 1A. (B) IFAs show that the full-length complementation (AC9<sup>wt</sup>) targets correctly to  
638 the apical cap and is not affected by the knockdown of endogenous AC9<sup>AID-3xHA</sup>. Green,  
639 rabbit anti-HA; magenta, mouse anti-Ty. (C) Staining with SAS6L indicates that the conoid  
640 is restored via complementation. Green, rabbit anti-HA; magenta, mouse anti-SAS6L. (D,  
641 E) Representative plaque assays and quantification of plaque numbers demonstrate that  
642 AC9<sup>AID-3xHA</sup> depletion results in no plaques while complementation with AC9<sup>wt</sup> fully

643 restores the plaque defect. (F) Diagram of AC9<sup>ΔCC</sup> with residues 75-113 deleted from the  
644 AC9<sup>wt</sup> construct. (G) AC9<sup>ΔCC</sup> fails to localize to the apical cap with faint, dispersed  
645 cytoplasmic staining (arrows) upon knockdown of endogenous AC9<sup>AID-3xHA</sup>. Green, rabbit  
646 anti-HA; magenta, mouse anti-Ty. (H) As expected from its mislocalization, AC9<sup>ΔCC</sup> fails  
647 to rescue SAS6L staining upon AC9<sup>AID-3xHA</sup> knockdown. Green, rabbit anti-HA; magenta,  
648 mouse anti-SAS6L. All scale bars are 2 μm. (I) Representative plaque assays and their  
649 quantifications demonstrate that complementation with AC9<sup>ΔCC</sup> cannot rescue the plaque  
650 defect. (J) Yeast expressing AC9<sup>wt</sup> and the indicated AC10 constructs were grown in  
651 permissive (-L/W) or restrictive (-L/W/H) conditions to assess interaction. A corresponding  
652 diagram of full-length AC9 is shown. (K) Y2H assessing the interaction of AC9 mutants  
653 with the indicated AC10 sequence, as in (J). Corresponding diagrams of AC9 deletion  
654 constructs are shown.

655

656 **Fig 4. AC10 CC1 binds both AC9 and ERK7 and is essential for apical cap function.**

657 (A) Y2H assessing interaction of full-length AC9 with the indicated AC10 constructs,  
658 which are shown with corresponding diagrams. The data for AC9:AC10<sup>A</sup> are shown again  
659 from Fig. 3J to facilitate a direct comparison. (B) Diagram of the full-length AC10 with a  
660 C-terminal V5 epitope tag (denoted as AC10<sup>wt</sup>). (C) IFA shows that AC10<sup>wt</sup> localizes  
661 properly to the apical cap, which is not affected by knockdown of the endogenous  
662 AC10<sup>AID-3xHA</sup>. Green, rabbit anti-HA; magenta, mouse anti-V5. (D) Representative plaque  
663 assay images and the corresponding quantification of plaque number and plaque size  
664 illustrate that AC10<sup>wt</sup> fully rescues the lytic ability of AC10<sup>AID-3xHA</sup> knockdown. Statistical  
665 significance was calculated using two-sample two-tailed t tests. (E) IFA demonstrates that

666 AC10<sup>wt</sup> rescues AC9 and ERK7 localization in the apical cap. Green, rabbit anti-Myc;  
667 magenta, mouse anti-Ty. (F) IFA using SAS6L shows that AC10<sup>wt</sup> restores the conoid  
668 +IAA. Green, rabbit anti-V5; magenta, mouse anti-SAS6L. (G) Diagram of AC10<sup>ΔCC1</sup> with  
669 residues 422-513 deleted from the AC10<sup>wt</sup> construct. (H) IFA shows that AC10<sup>ΔCC1</sup> targets  
670 properly to the apical cap regardless of AC10<sup>AID-3xHA</sup> knockdown. Green, rabbit anti-HA;  
671 magenta, mouse anti-V5. (I) Plaque assays demonstrate that AC10<sup>ΔCC1</sup> cannot rescue  
672 the parasite's lytic ability. (J) IFA shows that AC9 is present in the apical cap while ERK7  
673 is mislocalized to the cytoplasm upon knockdown of AC10<sup>AID-3xHA</sup>. Green, rabbit anti-Myc;  
674 magenta, mouse anti-Ty. (K) IFA illustrates that AC10<sup>ΔCC1</sup> does not rescue SAS6L  
675 localization, indicating the absence of the conoid. Green, rabbit anti-V5; magenta, mouse  
676 anti-SAS6L. All scale bars are 2 μm.

677

678 **Fig 5. Both regions of ERK7 interact with multiple regions of AC10.**

679 Y2H assay to assess interaction of ERK7<sup>kinase</sup> (2-358) or ERK7<sup>C-term</sup> (359-652) with the  
680 indicated AC10 constructs.

681

682 **Fig 6. The conserved AC9 binding domain within AC10 is essential for AC10**  
683 **function.**

684 (A) Multiple sequence alignments and accompanying sequence logo mapped to  
685 TgAC10<sup>658-700</sup>. Conserved residues are highlighted by class (blue: hydrophobic, purple:  
686 acidic, red: basic, green: polar, orange: Gly, yellow: Pro). (B) Y2H showing interaction of  
687 full-length AC9 with the AC10<sup>AC9-BD</sup> (residues 651-683). (C) Diagram of AC10<sup>Δ(AC9-BD)</sup> with  
688 residues 651-683 deleted from the AC10<sup>wt</sup> construct. (D) AC10<sup>Δ(AC9-BD)</sup> localizes properly

689 to the apical cap +/- IAA. Green, rabbit anti-HA; magenta, mouse anti-V5. (E) Plaque  
690 assays show that AC10 $\Delta$ (AC9-BD)-complemented parasites cannot form plaques upon  
691 knockdown of endogenous AC10<sup>AID-3xHA</sup>. (F) AC10 $\Delta$ (AC9-BD) cannot rescue the recruitment  
692 of either AC9 or ERK7 to the apical cap. Green, rabbit anti-Myc; magenta, mouse anti-Ty.  
693 (G) IFA shows that SAS6L cannot be restored when complemented with AC10 $\Delta$ (AC9-BD).  
694 Green, rabbit anti-V5; magenta, mouse anti-SAS6L. All scale bars are 2  $\mu$ m.

695

696 **Fig 7. Deletion of CC2 within AC10 results in subtle plaque defects.**

697 (A) Y2H to assess interaction of full-length AC9 with the indicated AC10 mutants.  
698 Corresponding diagrams of AC10 deletion constructs are shown. (B) Diagram of  
699 AC10 $\Delta$ CC2 with residues 781-830 deleted from the AC10<sup>wt</sup> construct. (C) IFA shows that  
700 AC10 $\Delta$ CC2 localizes to the apical cap and is not affected by AC10<sup>AID-3xHA</sup> knockdown.  
701 Green, rabbit anti-HA; magenta, mouse anti-V5. (D) Plaque assays indicate that  
702 AC10 $\Delta$ CC2 complementation does not fully rescue the growth defect (15% reduction).  
703 Statistical significance was calculated using two-sample two-tailed t tests and p-values  
704 are noted on the graph. (E) AC9 and ERK7 staining +/- IAA shows that AC10 $\Delta$ CC2 can still  
705 recruit members of the complex to the apical cap. Green, rabbit anti-Myc; magenta,  
706 mouse anti-Ty. (F) IFA illustrates that AC10 $\Delta$ CC2 restores SAS6L staining at the conoid.  
707 Green, rabbit anti-V5; magenta, mouse anti-SAS6L. All scale bars are 2  $\mu$ m.

708

709 **Fig 8. N-terminal deletion of AC10 results in a substantial plaque defect.**

710 (A) Diagram of AC10 $\Delta$ N-term with residues 2-386 deleted from the AC10<sup>wt</sup> construct. (B)  
711 IFA shows that AC10 $\Delta$ N-term targets properly to the apical cap +/- IAA. Green, rabbit anti-

712 HA; magenta, mouse anti-V5. (C) Plaque assays show that AC10<sup>ΔN-term</sup> partially rescues  
713 the growth defect, resulting in smaller plaques upon AC10<sup>AID-3xHA</sup> knockdown (48%  
714 reduction). Statistical significance was calculated using two-sample two-tailed t tests and  
715 p-values are noted on the graph. (D) IFA illustrates that AC9 and ERK7 are present in the  
716 apical cap +/- IAA. Green, rabbit anti-Myc; magenta, mouse anti-Ty. (E) SAS6L staining  
717 indicates that the conoid is present +/- IAA. Green, rabbit anti-V5; magenta, mouse anti-  
718 SAS6L. All scale bars are 2 μm.

719

720 **Fig 9. C-terminal deletion of AC10 diminishes maternal apical cap localization and**  
721 **causes severe fitness defects.**

722 (A) Diagram of AC10<sup>ΔC-term</sup> with residues 914-1979 deleted from the AC10<sup>wt</sup> construct. (B)  
723 IFA shows that mature parasites have proper AC10<sup>ΔC-term</sup> localization +/- IAA. Green,  
724 rabbit anti-HA; magenta, mouse anti-V5. (C) In contrast, actively budding parasites have  
725 substantially diminished AC10<sup>ΔC-term</sup> localization in maternal apical caps (inset, yellow  
726 arrows), while AC10<sup>ΔC-term</sup> localization to daughter buds is unaffected (inset, white  
727 arrowheads). Green, rabbit anti-HA; magenta, mouse anti-V5. (D) IFA depicts that both  
728 AC9 and ERK7 are substantially mislocalized to the cytoplasm in mature parasites +IAA  
729 (insets, yellow arrows). Green, rabbit anti-Myc; magenta, mouse anti-Ty. (E) In budding  
730 parasites, IFAs show severely decreased levels of AC9 in the maternal apical cap (insets,  
731 yellow arrows) but intact localization in daughter buds (insets, white arrowheads). ERK7  
732 appears absent from the apical cap upon depletion of AC10<sup>AID-3xHA</sup>. Green, rabbit anti-  
733 Myc; magenta, mouse anti-Ty. (F) IFAs demonstrate that SAS6L staining appears intact  
734 upon degradation of AC10<sup>AID-3xHA</sup>. Green, rabbit anti-V5; magenta, mouse anti-SAS6L. All



735 scale bars are 2  $\mu$ m. (G) Plaque assays show extremely small plaques upon knockdown  
736 of AC10<sup>AID-3xHA</sup> (85% reduction). Statistical significance was calculated using two-sample  
737 two-tailed t tests and p-values are noted on the graph. (H) Diagram illustrating the  
738 AC10<sup>914-1300</sup> construct used in the following Y2H assay. (I) Y2H to assess the interaction  
739 of full-length AC9 with AC10<sup>914-1300</sup>.

740

741 **Fig 10. Combination of N- and C-terminal deletions is essential for apical cap**  
742 **function.**

743 (A) Diagram of AC10 <sup>$\Delta$ N/C</sup> combining the AC10 <sup>$\Delta$ N-term</sup> (residues 2-337) and AC10 <sup>$\Delta$ C-term</sup>  
744 (residues 914-1979) deletions from the AC10<sup>wt</sup> construct. (B) IFAs illustrate that AC10 <sup>$\Delta$ N/C</sup>  
745 localizes properly to the apical caps in mature parasites -/+ IAA. Green, rabbit anti-HA;  
746 magenta, mouse anti-V5. (C) IFAs show that AC10 <sup>$\Delta$ N/C</sup> appears almost completely absent  
747 in the maternal apical cap of budding parasites upon depletion of AC10<sup>AID-3xHA</sup> (insets,  
748 yellow arrows). However, in daughter apical caps, AC10 <sup>$\Delta$ N/C</sup> remains intact even upon  
749 depletion of endogenous AC10<sup>AID-3xHA</sup> (insets, white arrowheads). Green, rabbit anti-HA;  
750 magenta, mouse anti-V5. (D) Plaque assays show that deleting both N- and C-terminal  
751 regions from AC10 eliminates plaque formation. (E) IFAs display the absence of AC9 and  
752 ERK7 from mature apical caps. Green, rabbit anti-Myc; magenta, mouse anti-Ty. (F) IFAs  
753 show that AC9 and ERK7 remain intact in daughter apical caps (insets, white arrowheads)  
754 but appear completely eliminated from maternal apical caps upon knockdown of AC10<sup>AID-</sup>  
755 <sup>3xHA</sup> (insets, yellow arrows). Green, rabbit anti-Myc; magenta, mouse anti-Ty. (G) IFAs  
756 display absence of SAS6L upon AC10<sup>AID-3xHA</sup> knockdown. Green, rabbit anti-V5; magenta,  
757 mouse anti-SAS6L. All scale bars are 2  $\mu$ m.

758

759 **Fig 11. ERK7 robustly phosphorylates AC10 *in vitro*.**

760 Autoradiogram and corresponding coomassie stained gel of an *in vitro* kinase assay in  
761 which 1  $\mu$ M ERK7 was used to phosphorylate 10  $\mu$ M AC10<sup>313-569</sup> or the generic substrate  
762 MBP. In the rightmost 3 lanes, 10  $\mu$ M inhibitory AC9<sup>418-452</sup> was added to the reaction. Note  
763 that the rightmost lane contains both MBP and AC10 as substrates.

764

765 **Fig 12. Model for AC9:AC10:ERK7 complex oligomerization in the apical cap.** AC9,  
766 AC10, and ERK7 oligomerize with the IMC cytoskeleton filaments that are associated  
767 with the cytosolic leaflet of the IMC membrane. AC10 recruits the other two proteins to  
768 the IMC, possibly through interaction with an undescribed adaptor protein. Because AC10  
769 has multiple binding sites for both AC9 and ERK7, which also interact with one another,  
770 the three proteins likely form an irregular oligomer. These interactions concentrate ERK7  
771 at the apical cap while allowing it to bind and phosphorylate its substrates and thereby  
772 facilitate the stability of the apical complex.

773

774 **Fig S1. Antibody validation for IMC12.**

775 (A) IFAs show the IMC12 antibody co-localized with IMC1. Upper panels show mature  
776 parasites while the lower panels show ones in the process of budding, highlighting that  
777 IMC12 localizes exclusively to the maternal IMC. Green, rabbit anti-IMC12; magenta,  
778 mouse anti-IMC1. IFA scale bars are 2  $\mu$ m. (B) Western blot analysis validates the  
779 efficacy of the IMC12 antibody. Endogenously tagged IMC12<sup>3xMyc</sup> parasites display the  
780 upshift in protein size due to the mass of the epitope tag compared to untagged parasites,

781 solidifying the identity of the band detected by the IMC12 antibody. IMC12 detected with  
782 rabbit anti-IMC12; IMC12<sup>3xMyc</sup> detected with mouse anti-Myc. Rabbit anti-IMC6 was used  
783 as a loading control.

784

785 **Fig S2. Line intensity scans of ERK7 localization.**

786 Fluorescence intensity was measured across the indicated white lines and the resulting  
787 relative intensity values from the four lines were averaged to produce the line intensity  
788 graph. Orange shading depicts the approximate position of the apical cap.

789

790 **Fig S3. Relative protein expression levels of mislocalized AC9 and AC10.**

791 (A) Western blot of whole cell lysates showing the protein expression levels of AC9<sup>wt</sup> and  
792 AC9<sup>ΔCC</sup> +/- IAA. AC9<sup>wt</sup> and AC9<sup>ΔCC</sup> were detected with mouse anti-Ty1 and rabbit anti-  
793 IMC12 was used as loading control. (B) Western blot showing migration of the indicated  
794 AC10 complementation constructs +/- IAA. AC10<sup>wt</sup> undergoes substantial breakdown  
795 during processing (also see Fig. 2C). Red arrows indicate the likely primary translation  
796 product for each construct. AC10 constructs were detected with mouse anti-V5 and rabbit  
797 anti-IMC12 was used as loading control.

798

799 **Fig S4. Control Y2H experiments.**

800 Y2H demonstrating lack of autoactivation of the indicated constructs. Each construct is  
801 co-expressed with the corresponding empty bait or prey vectors, as appropriate.

802

803 **Table S1. Oligonucleotides used in this study.**

804 All primer sequences are shown in the 5' to 3' orientation.

805

## 806 REFERENCES

- 807 1. Levine ND, Corliss JO, Cox FEG, Deroux G, Grain J, Honigberg BM, Leedale GF,  
808 Loeblich AR, Lom IJ, Lynn D, Merinfeld EG, Page FC, Poljansky G, Sprague V,  
809 Vavra J, Wallace FG. 1980. A Newly Revised Classification of the Protozoa\*. The  
810 Journal of Protozoology 27:37–58.
- 811 2. Hill DE, Chirukandoth S, Dubey JP. 2005. Biology and epidemiology of  
812 Toxoplasma gondii in man and animals. Anim Health Res Rev 6:41–61.
- 813 3. Mackintosh CL, Beeson JG, Marsh K. 2004. Clinical features and pathogenesis of  
814 severe malaria. Trends Parasitol 20:597–603.
- 815 4. Sow SO, Muhsen K, Nasrin D, Blackwelder WC, Wu Y, Farag TH, Panchalingam  
816 S, Sur D, Zaidi AKM, Faruque ASG, Saha D, Adegbola R, Alonso PL, Breiman RF,  
817 Bassat Q, Tamboura B, Sanogo D, Onwuchekwa U, Manna B, Ramamurthy T,  
818 Kanungo S, Ahmed S, Qureshi S, Quadri F, Hossain A, Das SK, Antonio M,  
819 Hossain MJ, Mandomando I, Nhampossa T, Acácio S, Omoro R, Oundo JO,  
820 Ochieng JB, Mintz ED, O'Reilly CE, Berkeley LY, Livio S, Tennant SM, Sommerfelt  
821 H, Nataro JP, Ziv-Baran T, Robins-Browne RM, Mishcherkin V, Zhang J, Liu J,  
822 Houpt ER, Kotloff KL, Levine MM. 2016. The Burden of Cryptosporidium Diarrheal  
823 Disease among Children < 24 Months of Age in Moderate/High Mortality Regions  
824 of Sub-Saharan Africa and South Asia, Utilizing Data from the Global Enteric  
825 Multicenter Study (GEMS). PLoS Negl Trop Dis 10:e0004729.

- 826 5. Dubey JP, Dubey J. 2003. Review of *Neospora caninum* and neosporosis in  
827 animals. *Korean J Parasitol* 41:1–16.
- 828 6. Kivaria FM. 2006. Estimated direct economic costs associated with tick-borne  
829 diseases on cattle in Tanzania. *Trop Anim Health Prod* 38:291–299.
- 830 7. Sharman PA, Smith NC, Wallach MG, Katrib M. 2010. Chasing the golden egg:  
831 vaccination against poultry coccidiosis. *Parasite Immunol* 32:590–598.
- 832 8. Gould SB, Tham W-H, Cowman AF, McFadden GI, Waller RF. 2008. Alveolins, a  
833 new family of cortical proteins that define the protist infrakingdom Alveolata. *Mol*  
834 *Biol Evol* 25:1219–1230.
- 835 9. Fréna K, Dubremetz J-F, Lebrun M, Soldati-Favre D. 2017. Gliding motility powers  
836 invasion and egress in Apicomplexa. 11. *Nature Reviews Microbiology* 15:645–  
837 660.
- 838 10. Francia ME, Striepen B. 2014. Cell division in apicomplexan parasites. *Nat Rev*  
839 *Microbiol* 12:125–136.
- 840 11. Harding CR, Meissner M. 2014. The inner membrane complex through  
841 development of *Toxoplasma gondii* and *Plasmodium*. *Cell Microbiol* 16:632–641.
- 842 12. Anderson-White BR, Ivey FD, Cheng K, Szatanek T, Lorestani A, Beckers CJ,  
843 Ferguson DJP, Sahoo N, Gubbels M-J. 2011. A family of intermediate filament-like  
844 proteins is sequentially assembled into the cytoskeleton of *Toxoplasma gondii*. *Cell*  
845 *Microbiol* 13:18–31.

- 846 13. Porchet E, Torpier G. 1977. [Freeze fracture study of *Toxoplasma* and *Sarcocystis*  
847 infective stages (author's transl)]. *Z Parasitenkd* 54:101–124.
- 848 14. Mann T, Beckers C. 2001. Characterization of the subpellicular network, a  
849 filamentous membrane skeletal component in the parasite *Toxoplasma gondii*. *Mol*  
850 *Biochem Parasitol* 115:257–268.
- 851 15. Chen AL, Kim EW, Toh JY, Vashisht AA, Rashoff AQ, Van C, Huang AS, Moon AS,  
852 Bell HN, Bentolila LA, Wohlschlegel JA, Bradley PJ. 2015. Novel components of  
853 the *Toxoplasma* inner membrane complex revealed by BiOID. *mBio* 6:e02357-  
854 02314.
- 855 16. Chen AL, Moon AS, Bell HN, Huang AS, Vashisht AA, Toh JY, Lin AH, Nadipuram  
856 SM, Kim EW, Choi CP, Wohlschlegel JA, Bradley PJ. 2017. Novel insights into the  
857 composition and function of the *Toxoplasma* IMC sutures. *Cell Microbiol* 19.
- 858 17. Anderson-White BR, Ivey FD, Cheng K, Szatanek T, Lorestani A, Beckers CJ,  
859 Ferguson DJP, Sahoo N, Gubbels M-J. 2011. A family of intermediate filament-like  
860 proteins is sequentially assembled into the cytoskeleton of *Toxoplasma gondii*. *Cell*  
861 *Microbiol* 13:18–31.
- 862 18. FrénaI K, Polonais V, Marq J-B, Stratmann R, Limenitakis J, Soldati-Favre D. 2010.  
863 Functional dissection of the apicomplexan glideosome molecular architecture. *Cell*  
864 *Host Microbe* 8:343–357.

- 865 19. Hu K, Johnson J, Florens L, Fraunholz M, Suravajjala S, DiLullo C, Yates J, Roos  
866 DS, Murray JM. 2006. Cytoskeletal Components of an Invasion Machine—The  
867 Apical Complex of *Toxoplasma gondii*. *PLOS Pathogens* 2:e13.
- 868 20. Gilk SD, Raviv Y, Hu K, Murray JM, Beckers CJM, Ward GE. 2006. Identification of  
869 PhIL1, a Novel Cytoskeletal Protein of the *Toxoplasma gondii* Pellicle, through  
870 Photosensitized Labeling with 5-[<sup>125</sup>I]Iodonaphthalene-1-Azide. *Eukaryotic Cell*  
871 5:1622–1634.
- 872 21. O’Shaughnessy WJ, Hu X, Beraki T, McDougal M, Reese ML. 2020. Loss of a  
873 conserved MAPK causes catastrophic failure in assembly of a specialized cilium-  
874 like structure in *Toxoplasma gondii*. *Mol Biol Cell* 31:881–888.
- 875 22. Tosetti N, Dos Santos Pacheco N, Bertiaux E, Maco B, Bournonville L, Hamel V,  
876 Guichard P, Soldati-Favre D. 2020. Essential function of the alveolin network in the  
877 subpellicular microtubules and conoid assembly in *Toxoplasma gondii*. *eLife*  
878 9:e56635.
- 879 23. Back PS, O’Shaughnessy WJ, Moon AS, Dewangan PS, Hu X, Sha J,  
880 Wohlschlegel JA, Bradley PJ, Reese ML. 2020. Ancient MAPK ERK7 is regulated  
881 by an unusual inhibitory scaffold required for *Toxoplasma* apical complex  
882 biogenesis. *Proc Natl Acad Sci U S A* 117:12164–12173.
- 883 24. Morrissette NS, Sibley LD. 2002. Cytoskeleton of Apicomplexan Parasites.  
884 *Microbiol Mol Biol Rev* 66:21–38.

- 885 25. Hu K, Roos DS, Murray JM. 2002. A novel polymer of tubulin forms the conoid of  
886 *Toxoplasma gondii*. *J Cell Biol* 156:1039–1050.
- 887 26. Okamoto N, Keeling PJ. 2014. The 3D Structure of the Apical Complex and  
888 Association with the Flagellar Apparatus Revealed by Serial TEM Tomography in  
889 *Psammosa pacifica*, a Distant Relative of the Apicomplexa. *PLOS ONE* 9:e84653.
- 890 27. Füßy Z, Masařová P, Kručinská J, Esson HJ, Oborník M. 2017. Budding of the  
891 Alveolate Alga *Vitrella brassicaformis* Resembles Sexual and Asexual Processes in  
892 Apicomplexan Parasites. *Protist* 168:80–91.
- 893 28. Scholtyseck E, Mehlhorn H, Friedhoff K. 1970. The fine structure of the conoid of  
894 sporozoa and related organisms. *Z F Parasitenkunde* 34:68–94.
- 895 29. Wall RJ, Roques M, Katris NJ, Koreny L, Stanway RR, Brady D, Waller RF, Tewari  
896 R. 2016. SAS6-like protein in *Plasmodium* indicates that conoid-associated apical  
897 complex proteins persist in invasive stages within the mosquito vector. *1. Scientific*  
898 *Reports* 6:1–12.
- 899 30. Wall RJ, Zeeshan M, Katris NJ, Limenitakis R, Rea E, Stock J, Brady D, Waller RF,  
900 Holder AA, Tewari R. 2019. Systematic analysis of *Plasmodium* myosins reveals  
901 differential expression, localisation, and function in invasive and proliferative  
902 parasite stages. *Cellular Microbiology* 21:e13082.
- 903 31. Koreny L, Zeeshan M, Barylyuk K, Tromer EC, Hooff JJE van, Brady D, Ke H,  
904 Chelaghma S, Ferguson DJP, Eme L, Tewari R, Waller RF. 2021. *Molecular*



- 905 characterization of the conoid complex in *Toxoplasma* reveals its conservation in  
906 all apicomplexans, including *Plasmodium* species. *PLOS Biology* 19:e3001081.
- 907 32. de Leon JC, Scheumann N, Beatty W, Beck JR, Tran JQ, Yau C, Bradley PJ, Gull  
908 K, Wickstead B, Morrissette NS. 2013. A SAS-6-like protein suggests that the  
909 *Toxoplasma* conoid complex evolved from flagellar components. *Eukaryot Cell*  
910 12:1009–1019.
- 911 33. Francia ME, Dubremetz J-F, Morrissette NS. 2016. Basal body structure and  
912 composition in the apicomplexans *Toxoplasma* and *Plasmodium*. *Cilia* 5:3.
- 913 34. Lentini G, Dubois DJ, Maco B, Soldati-Favre D, Frénel K. 2019. The roles of  
914 Centrin 2 and Dynein Light Chain 8a in apical secretory organelles discharge of  
915 *Toxoplasma gondii*. *Traffic* 20:583–600.
- 916 35. Francia ME, Jordan CN, Patel JD, Sheiner L, Demerly JL, Fellows JD, Leon JC de,  
917 Morrissette NS, Dubremetz J-F, Striepen B. 2012. Cell Division in Apicomplexan  
918 Parasites Is Organized by a Homolog of the Striated Rootlet Fiber of Algal Flagella.  
919 *PLOS Biology* 10:e1001444.
- 920 36. Blader IJ, Coleman BI, Chen C-T, Gubbels M-J. 2015. Lytic Cycle of *Toxoplasma*  
921 *gondii*: 15 Years Later. *Annu Rev Microbiol* 69:463–485.
- 922 37. Carmen MGD, Mondragón M, González S, Mondragón R. 2009. Induction and  
923 regulation of conoid extrusion in *Toxoplasma gondii*. *Cellular Microbiology* 11:967–  
924 982.

- 925 38. Graindorge A, Fréchal K, Jacot D, Salamun J, Marq JB, Soldati-Favre D. 2016. The  
926 Conoid Associated Motor MyoH Is Indispensable for *Toxoplasma gondii* Entry and  
927 Exit from Host Cells. *PLOS Pathogens* 12:e1005388.
- 928 39. Long S, Brown KM, Drewry LL, Anthony B, Phan IQH, Sibley LD. 2017.  
929 Calmodulin-like proteins localized to the conoid regulate motility and cell invasion  
930 by *Toxoplasma gondii*. *PLOS Pathogens* 13:e1006379.
- 931 40. Tosetti N, Dos Santos Pacheco N, Soldati-Favre D, Jacot D. 2019. Three F-actin  
932 assembly centers regulate organelle inheritance, cell-cell communication and  
933 motility in *Toxoplasma gondii*. *eLife* 8:e42669.
- 934 41. Leung JM, He Y, Zhang F, Hwang Y-C, Nagayasu E, Liu J, Murray JM, Hu K. 2017.  
935 Stability and function of a putative microtubule-organizing center in the human  
936 parasite *Toxoplasma gondii*. *MBoC* 28:1361–1378.
- 937 42. Katris NJ, van Dooren GG, McMillan PJ, Hanssen E, Tilley L, Waller RF. 2014. The  
938 Apical Complex Provides a Regulated Gateway for Secretion of Invasion Factors in  
939 *Toxoplasma*. *PLoS Pathog* 10:e1004074.
- 940 43. Donald RG, Roos DS. 1995. Insertional mutagenesis and marker rescue in a  
941 protozoan parasite: cloning of the uracil phosphoribosyltransferase locus from  
942 *Toxoplasma gondii*. *PNAS* 92:5749–5753.
- 943 44. Choi CP, Moon AS, Back PS, Jami-Alahmadi Y, Vashisht AA, Wohlschlegel JA,  
944 Bradley PJ. 2019. A photoactivatable crosslinking system reveals protein

- 945 interactions in the *Toxoplasma gondii* inner membrane complex. PLOS Biology  
946 17:e3000475.
- 947 45. Torres JA, Pasquarelli RR, Back PS, Moon AS, Bradley PJ. 2021. Identification and  
948 Molecular Dissection of IMC32, a Conserved *Toxoplasma* Inner Membrane  
949 Complex Protein That Is Essential for Parasite Replication. mBio 12:e03622-20.
- 950 46. Kelley LA, Mezulis S, Yates CM, Wass MN, Sternberg MJE. 2015. The Phyre2 web  
951 portal for protein modeling, prediction and analysis. Nat Protoc 10:845–858.
- 952 47. Treeck M, Sanders JL, Elias JE, Boothroyd JC. 2011. The phosphoproteomes of  
953 *Plasmodium falciparum* and *Toxoplasma gondii* reveal unusual adaptations within  
954 and beyond the parasites' boundaries. Cell Host Microbe 10:410–419.
- 955 48. Brad A. H, David CS. 2016. Enzyme Activity Assays for Protein Kinases: Strategies  
956 to Identify Active Substrates. Current Drug Discovery Technologies 13:2–15.
- 957 49. Sidik SM, Huet D, Ganesan SM, Huynh M-H, Wang T, Nasamu AS, Thiru P, Saeij  
958 JPJ, Carruthers VB, Niles JC, Lourido S. 2016. A Genome-wide CRISPR Screen in  
959 *Toxoplasma* Identifies Essential Apicomplexan Genes. Cell 166:1423-1435.e12.
- 960 50. Lupas AN, Bassler J. 2017. Coiled Coils - A Model System for the 21st Century.  
961 Trends Biochem Sci 42:130–140.
- 962 51. Donald RGK, Carter D, Ullman B, Roos DS. 1996. Insertional Tagging, Cloning,  
963 and Expression of the *Toxoplasma gondii* Hypoxanthine-Xanthine-Guanine  
964 Phosphoribosyltransferase Gene: USE AS A SELECTABLE MARKER FOR

- 965 STABLE TRANSFORMATION \*. *Journal of Biological Chemistry* 271:14010–  
966 14019.
- 967 52. Donald RG, Roos DS. 1993. Stable molecular transformation of *Toxoplasma*  
968 *gondii*: a selectable dihydrofolate reductase-thymidylate synthase marker based on  
969 drug-resistance mutations in malaria. *PNAS* 90:11703–11707.
- 970 53. Kim K, Soldati D, Boothroyd JC. 1993. Gene replacement in *Toxoplasma gondii*  
971 with chloramphenicol acetyltransferase as selectable marker. *Science* 262:911–  
972 914.
- 973 54. Bastin P, Bagherzadeh A, Matthews KR, Gull K. 1996. A novel epitope tag system  
974 to study protein targeting and organelle biogenesis in *Trypanosoma brucei*.  
975 *Molecular and Biochemical Parasitology* 77:235–239.
- 976 55. Evan GI, Lewis GK, Ramsay G, Bishop JM. 1985. Isolation of monoclonal  
977 antibodies specific for human c-myc proto-oncogene product. *Molecular and*  
978 *Cellular Biology* 5:3610–3616.
- 979 56. Wichroski MJ, Melton JA, Donahue CG, Tweten RK, Ward GE. 2002. *Clostridium*  
980 *septicum* Alpha-Toxin Is Active against the Parasitic Protozoan *Toxoplasma gondii*  
981 and Targets Members of the SAG Family of Glycosylphosphatidylinositol-Anchored  
982 Surface Proteins. *Infection and Immunity* 70:4353–4361.
- 983 57. Beck JR, Rodriguez-Fernandez IA, Leon JC de, Huynh M-H, Carruthers VB,  
984 Morrissette NS, Bradley PJ. 2010. A Novel Family of *Toxoplasma* IMC Proteins

- 985        Displays a Hierarchical Organization and Functions in Coordinating Parasite  
986        Division. PLOS Pathogens 6:e1001094.
- 987 58. Bradley PJ, Ward C, Cheng SJ, Alexander DL, Coller S, Coombs GH, Dunn JD,  
988 Ferguson DJ, Sanderson SJ, Wastling JM, Boothroyd JC. 2005. Proteomic  
989 Analysis of Rhoptry Organelles Reveals Many Novel Constituents for Host-Parasite  
990 Interactions in *Toxoplasma gondii*\*. Journal of Biological Chemistry 280:34245–  
991 34258.
- 992 59. Sidik SM, Hackett CG, Tran F, Westwood NJ, Lourido S. 2014. Efficient Genome  
993 Engineering of *Toxoplasma gondii* Using CRISPR/Cas9. PLOS ONE 9:e100450.
- 994 60. Huynh M-H, Carruthers VB. 2009. Tagging of Endogenous Genes in a *Toxoplasma*  
995 *gondii* Strain Lacking Ku80. Eukaryotic Cell 8:530–539.
- 996

Fig. 1

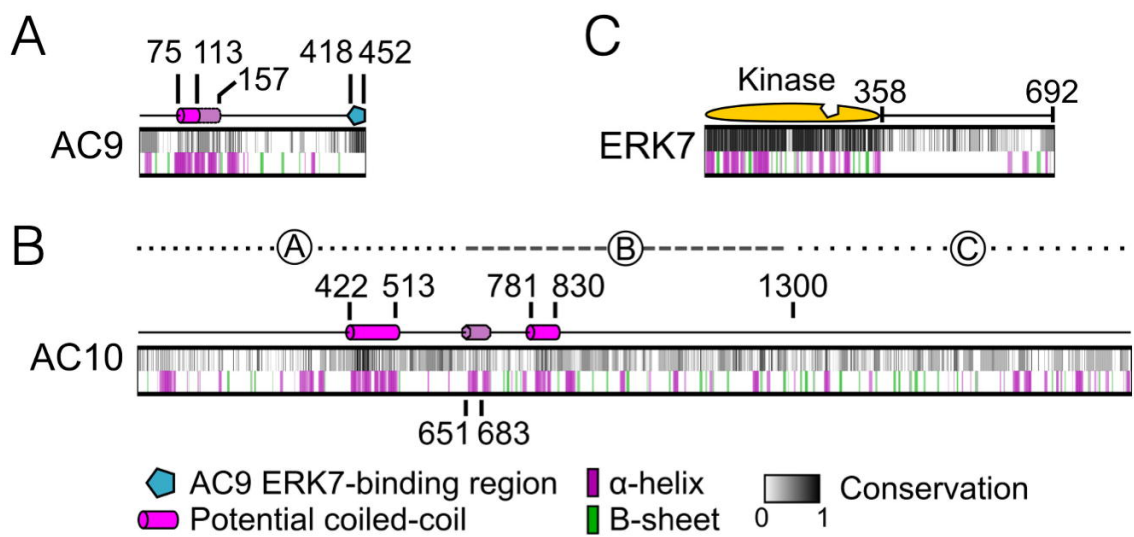

Fig. 2

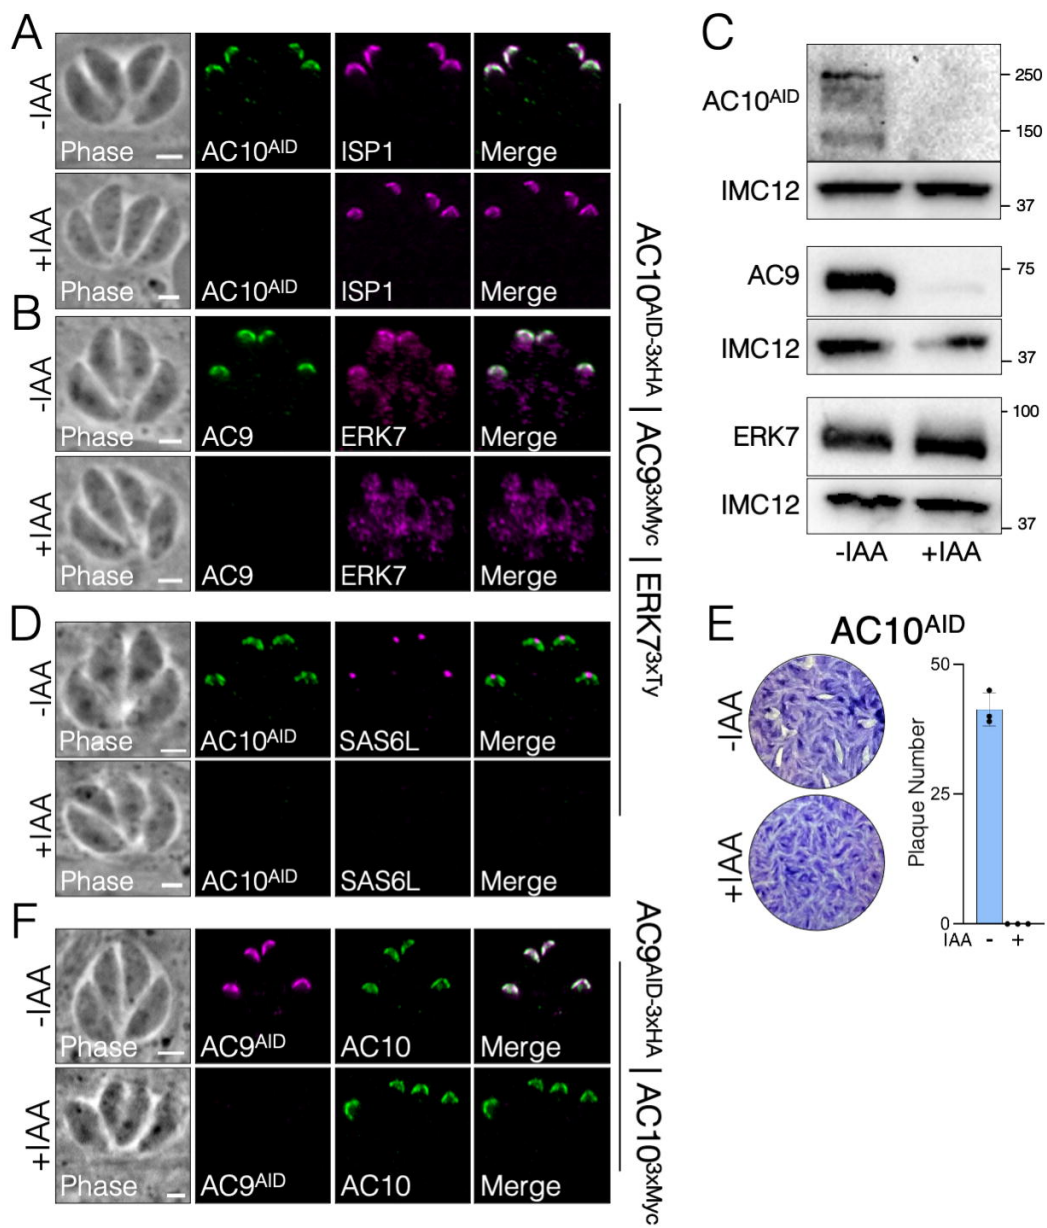

Fig. 3

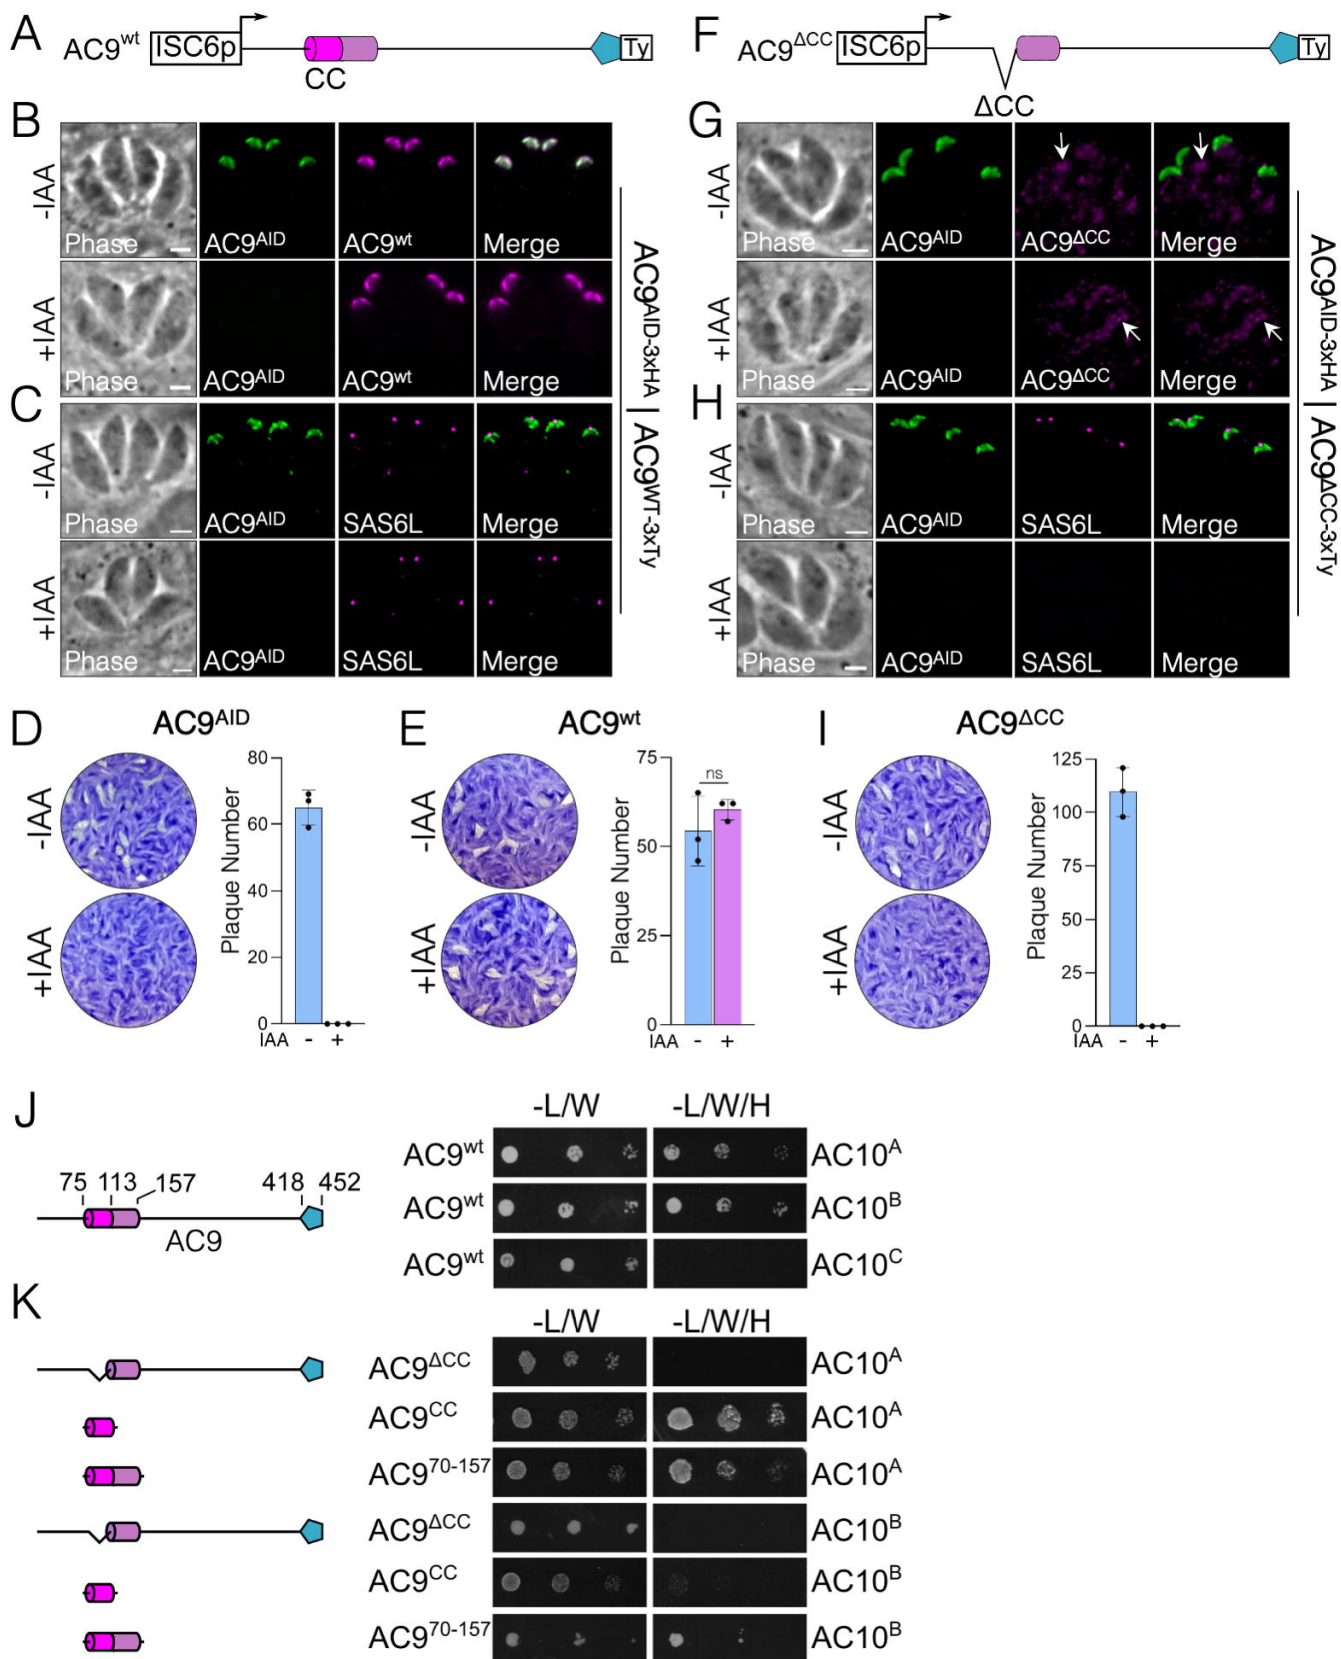



Fig. 4

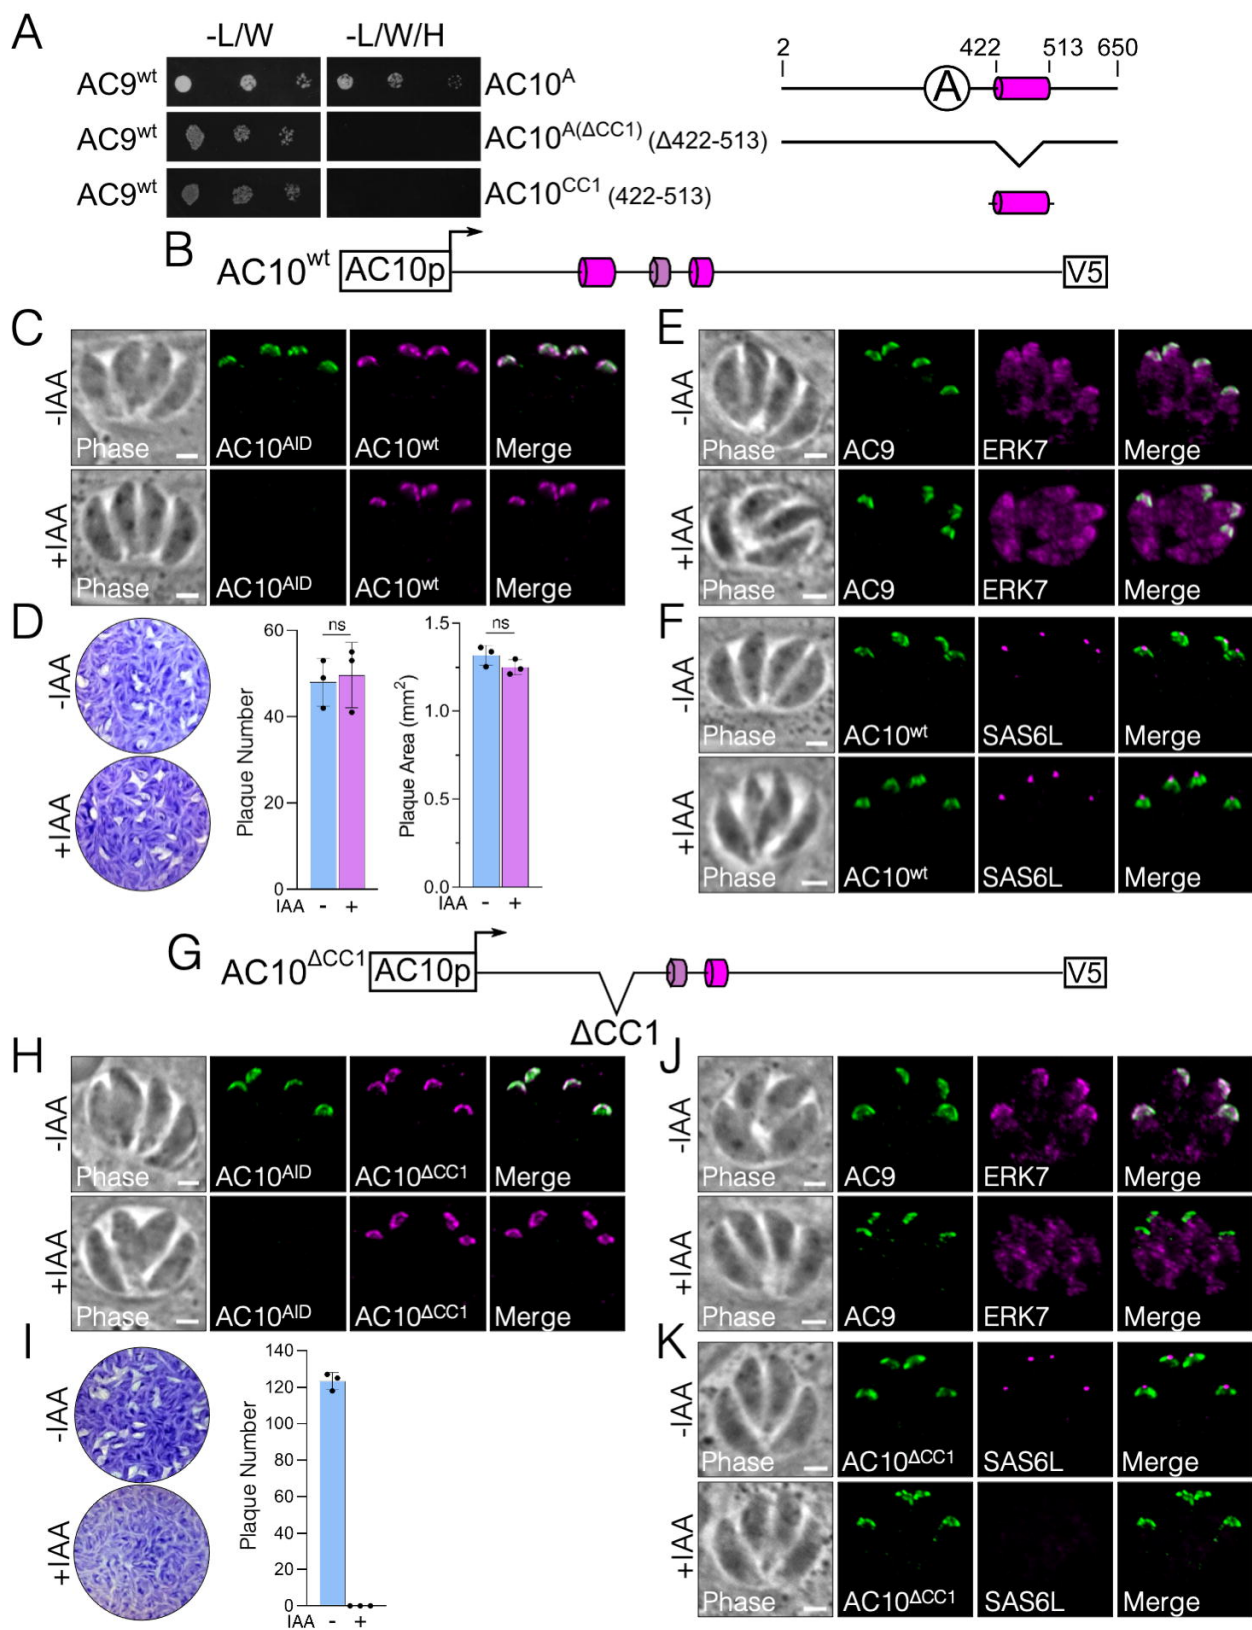

Fig. 5

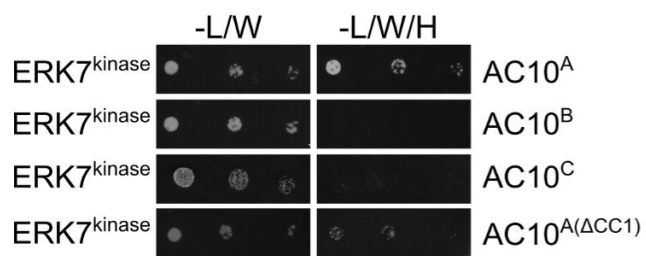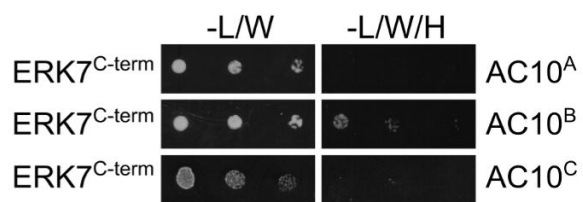

Fig. 6

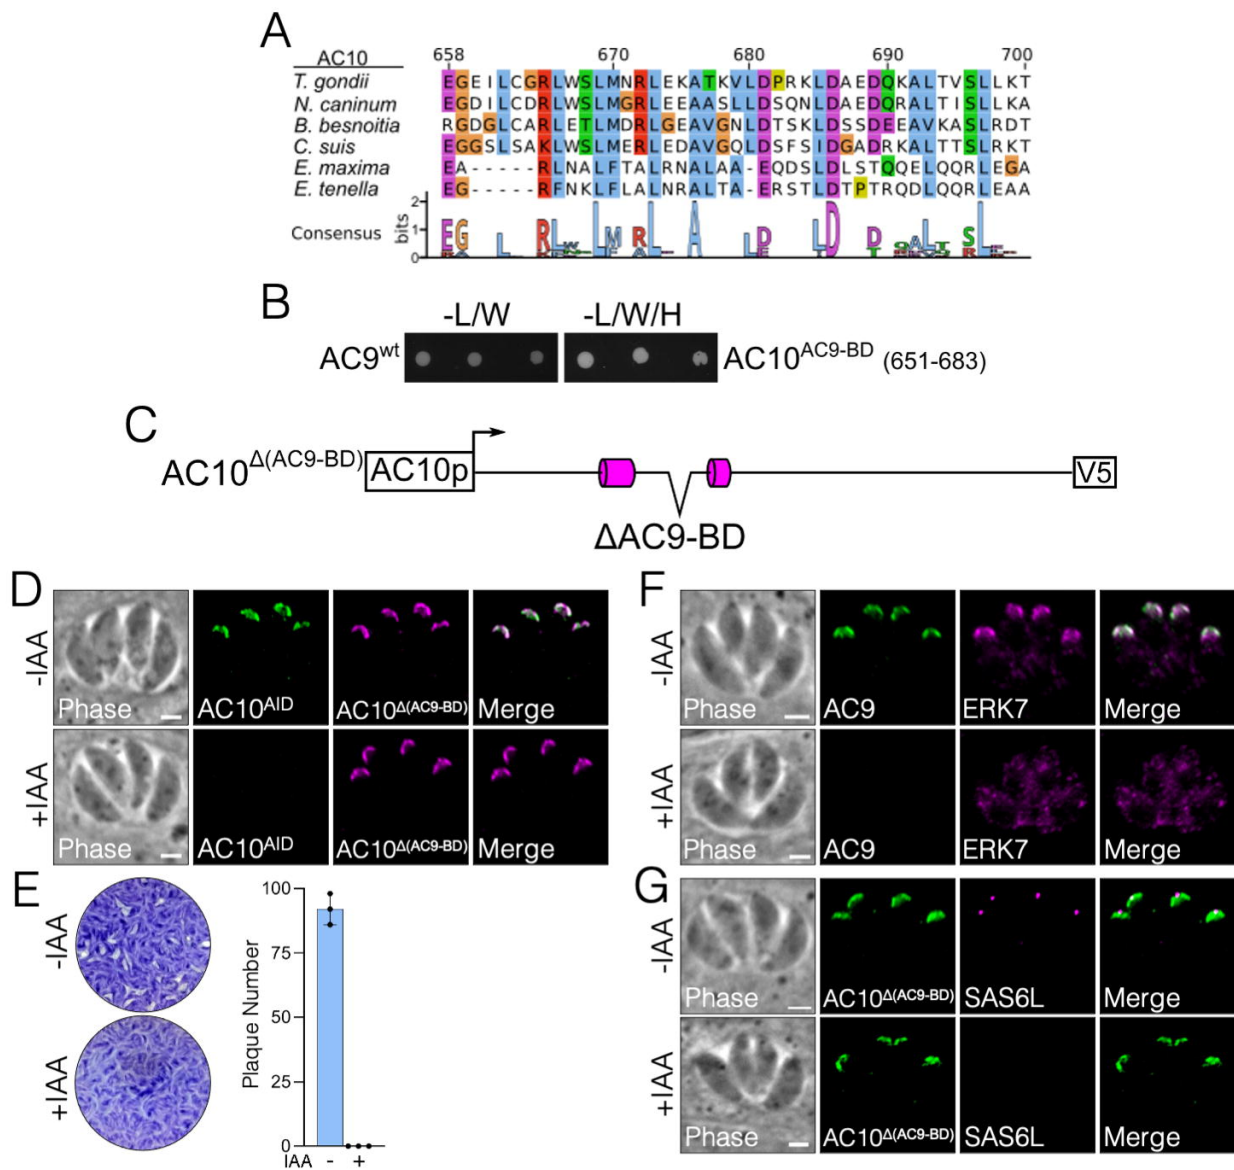

Fig. 7

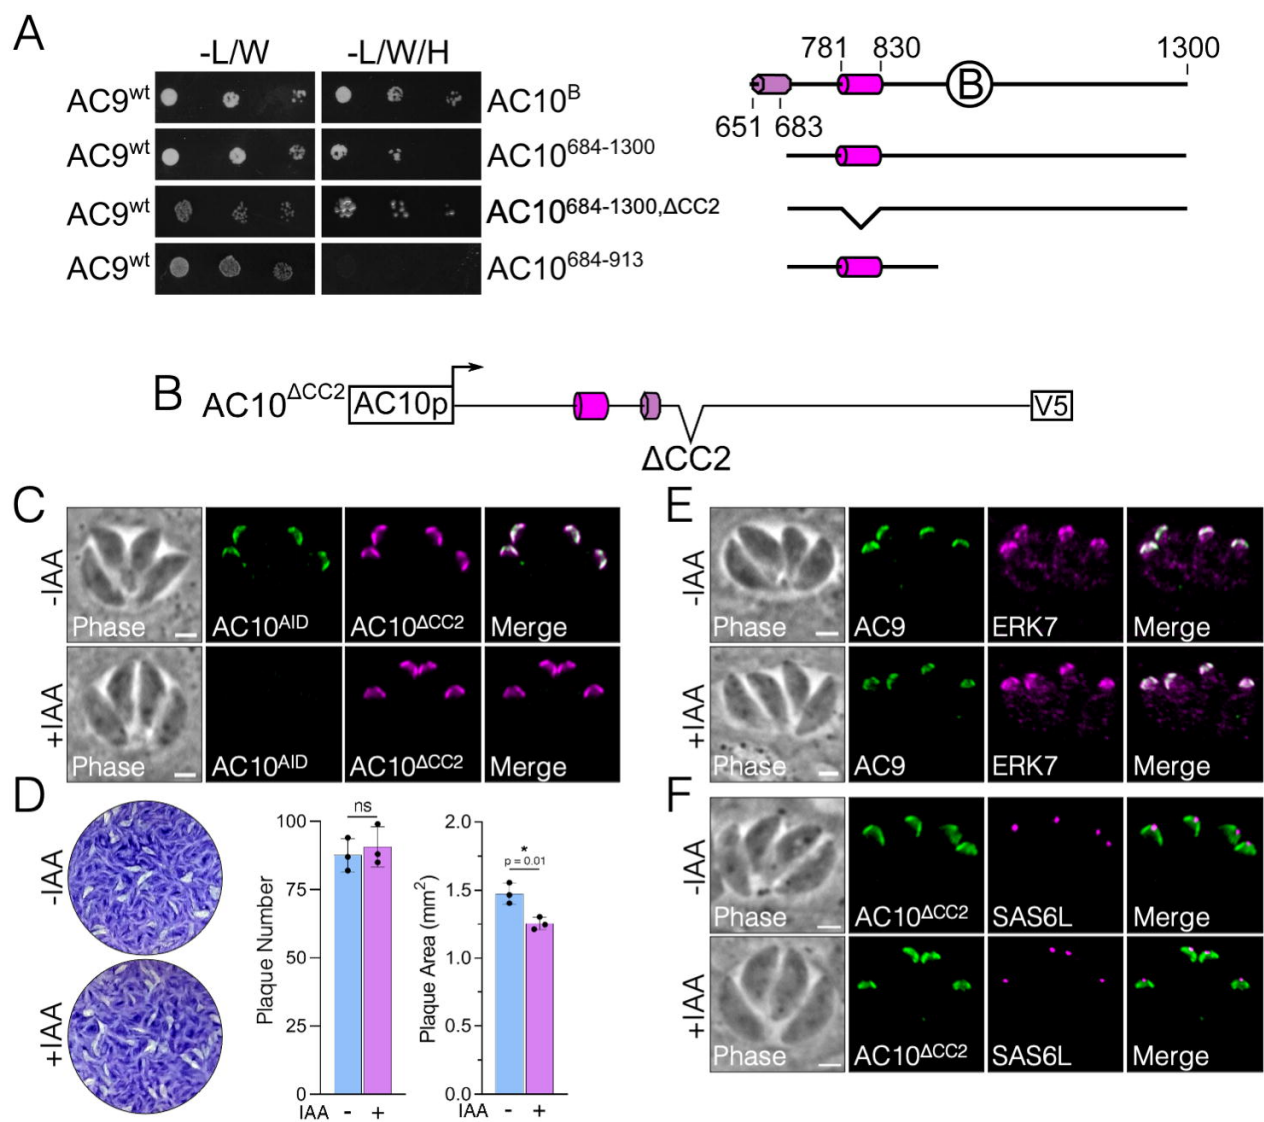

Fig. 8

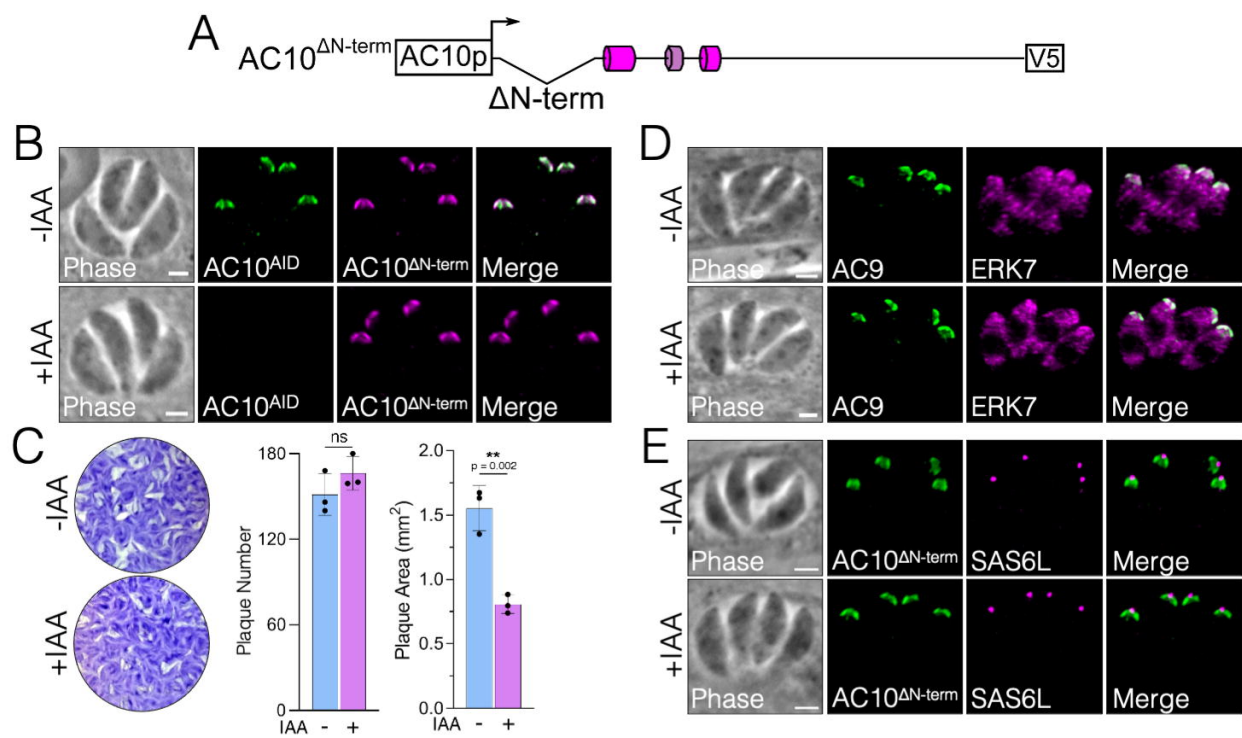

Fig. 9

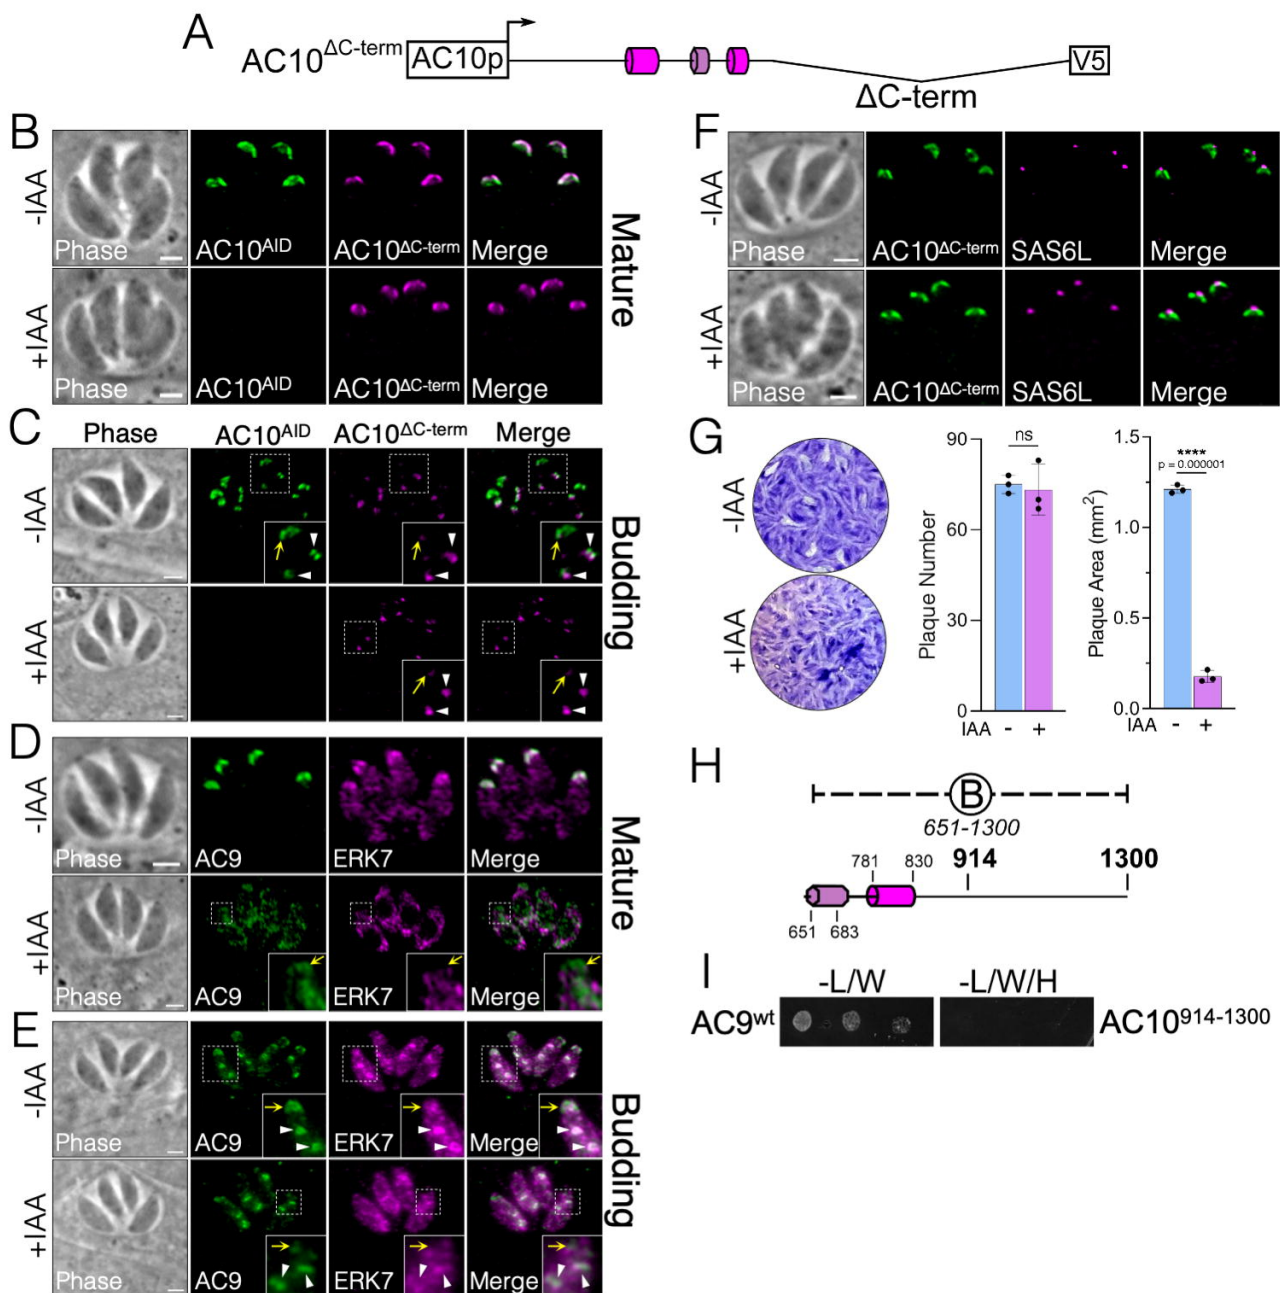

Fig. 10

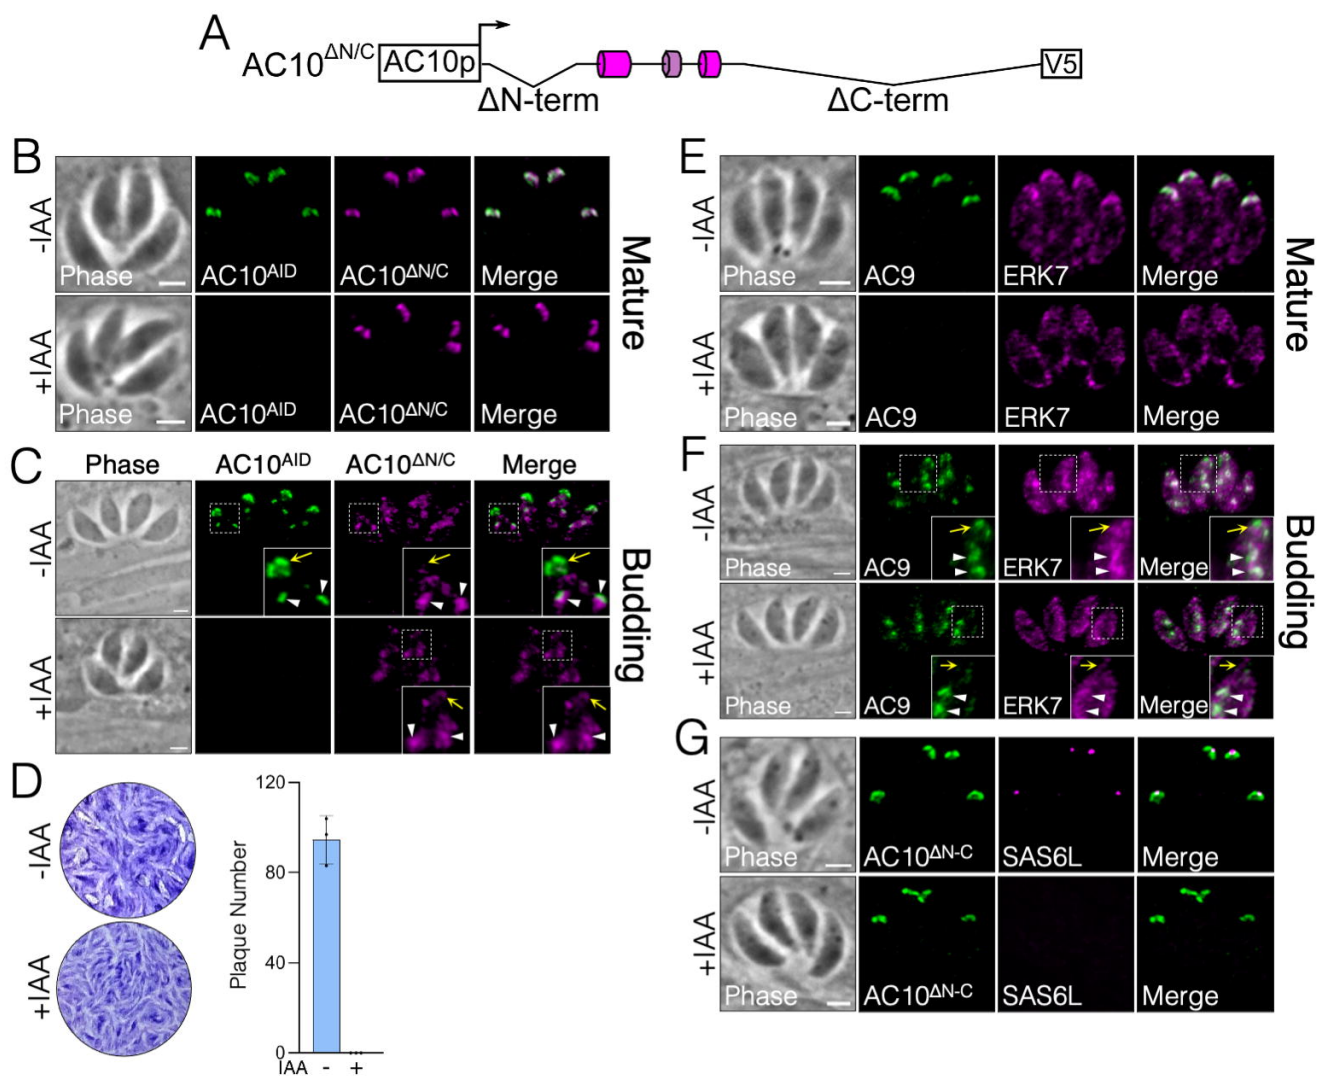

Fig. 11

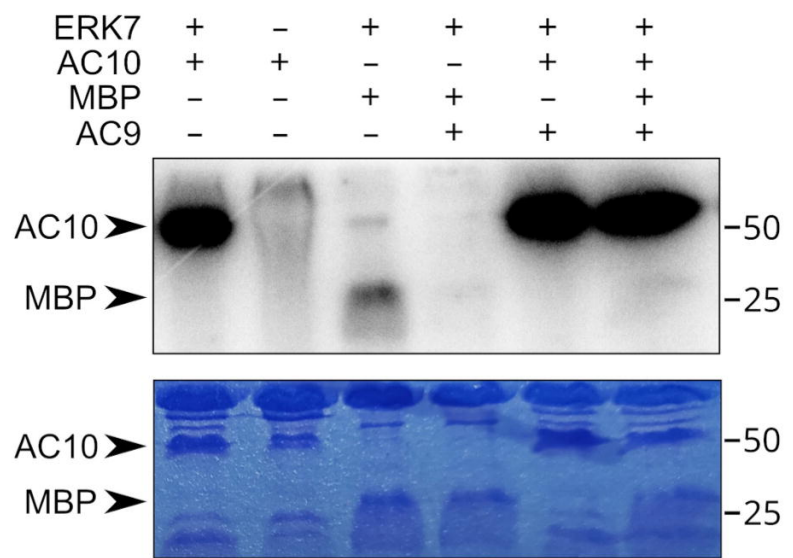



Fig. 12

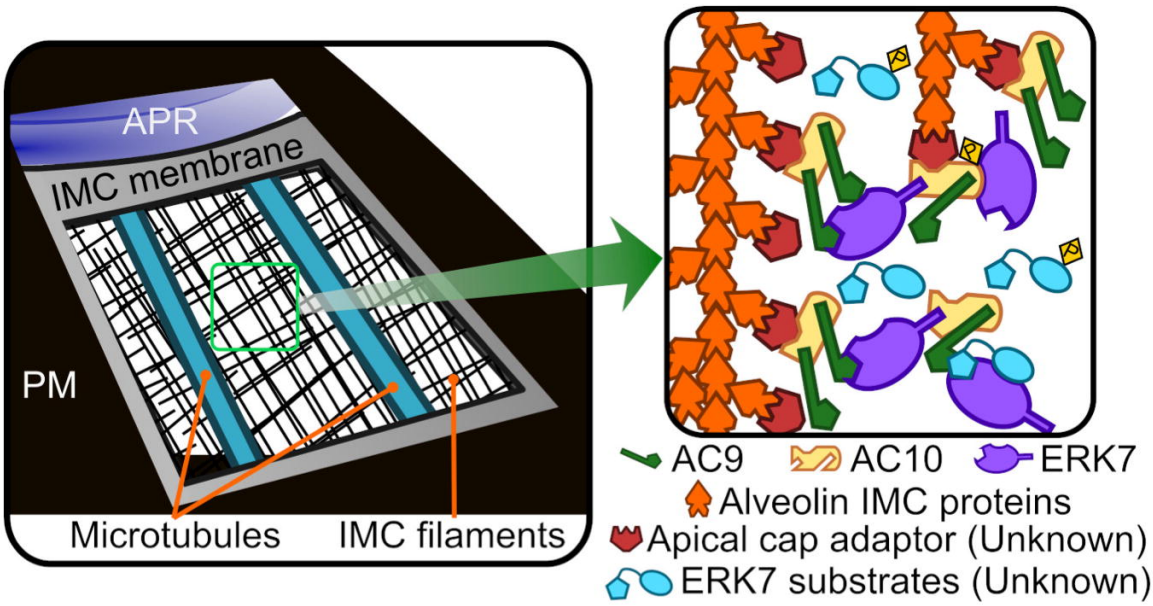

| <b>Bait</b>            | <b>Prey</b>                     | <b>Growth</b> |
|------------------------|---------------------------------|---------------|
| AC9 <sup>wt</sup>      | AC10 <sup>A</sup>               | +++           |
| AC9 <sup>wt</sup>      | AC10 <sup>B</sup>               | +++           |
| AC9 <sup>wt</sup>      | AC10 <sup>C</sup>               | -             |
| AC9 <sup>wt</sup>      | AC10 <sup>AΔCC1</sup>           | -             |
| AC9 <sup>wt</sup>      | AC10 <sup>AC9BD (651-683)</sup> | +++           |
| AC9 <sup>wt</sup>      | AC10 <sup>684-1300</sup>        | ++            |
| AC9 <sup>wt</sup>      | AC10 <sup>684-1300(ΔCC2)</sup>  | ++            |
| AC9 <sup>ΔCC</sup>     | AC10 <sup>A</sup>               | -             |
| AC9 <sup>CC</sup>      | AC10 <sup>A</sup>               | +             |
| AC9 <sup>70-157</sup>  | AC10 <sup>A</sup>               | +++           |
| AC9 <sup>ΔCC</sup>     | AC10 <sup>B</sup>               | -             |
| AC9 <sup>CC</sup>      | AC10 <sup>B</sup>               | +             |
| AC9 <sup>70-157</sup>  | AC10 <sup>B</sup>               | +++           |
| AC9 <sup>wt</sup>      | AC10 <sup>CC1</sup>             | -             |
| AC9 <sup>wt</sup>      | AC10 <sup>684-913</sup>         | -             |
| AC9 <sup>wt</sup>      | AC10 <sup>914-1300</sup>        | -             |
| ERK7 <sup>Kinase</sup> | AC10 <sup>A</sup>               | +++           |
| ERK7 <sup>Kinase</sup> | AC10 <sup>B</sup>               | -             |
| ERK7 <sup>Kinase</sup> | AC10 <sup>C</sup>               | -             |
| ERK7 <sup>Kinase</sup> | AC10 <sup>AΔCC1</sup>           | ++            |
| ERK7 <sup>C-term</sup> | AC10 <sup>A</sup>               | -             |
| ERK7 <sup>C-term</sup> | AC10 <sup>B</sup>               | ++            |
| ERK7 <sup>C-term</sup> | AC10 <sup>C</sup>               | -             |

**Table 1: Overview of yeast-two-hybrid data.** Bait and prey constructs and their relative growth on selective media are noted.
