# Supplementary material for: Multivalent interactions drive the Toxoplasma AC9:AC10:ERK7 complex to concentrate ERK7 in the apical cap
Source: bioRxiv or medRxiv preprint supplement (doi:10.1101/2022.01.04.474968), 2022-01-04
Supplement: Supplementary file [file media-5.pdf]

Supplemental Table 1: Oligonucleotides used in this study.

| Purpose                                       | Name                       | Description                 | Sequence 5'-3'                                                 |
|-----------------------------------------------|----------------------------|-----------------------------|----------------------------------------------------------------|
| AC10 (TGGT1_292950) tagging                   | P1                         | AC10 gRNA-tagging sense     | AAGTTgTAAGGGTGCAGAGTTGATGG                                     |
|                                               | P2                         | AC10 gRNA-tagging antisense | AAAACCATCAACTCTTGCACCCCTTAcA                                   |
|                                               | P3                         | AC10 5' HDR template        | GCTGAAGACTCGCCTGATAAAGCTCACGAAGCAAACACGGGAAGTGGAGGACGGGAATT    |
|                                               | P4                         | AC10 3' HDR template        | AGTCCACTGCTGCTCCTCGAGCAGTCTGGGAGATTTGGCGACGGCCAGTGAATTGTAATA   |
| AC9 (TGGT1_246950) tagging                    | P5                         | AC9 gRNA-tagging sense      | AAGTTATGTGTTCTCCTCAAATGTCAGG                                   |
|                                               | P6                         | AC9 gRNA-tagging antisense  | AAAACCTGACATTTGAGGAACACATA                                     |
|                                               | P7                         | AC9 5' HDR template         | GTCGGGGAACCGCAACCGAGTGAATATCCGCAGGGAATGGGAAGTGGAGGACGGGAATTC   |
|                                               | P8                         | AC9 3' HDR template         | CTCGCAGCTGTGCGACTGAACTCTTGTGCGGAGAGAGCGACGGCCAGTGAATTGTAATA    |
| ERK7 (TGGT1_233010) tagging                   | P9                         | ERK7 gRNA-tagging sense     | AAGTTGCAAAAAGCAAAGATTCAGACG                                    |
|                                               | P10                        | ERK7 gRNA-tagging antisense | AAAACGTCTGAATCTTTGCTTTTGCA                                     |
|                                               | P11                        | ERK7 5' HDR template        | TTCTCTTTTTTTTCAGTCTGCGTCCAAGACATACAAACAGCGGAAGTGGAGGACGGGAATT  |
|                                               | P12                        | ERK7 3' HDR template        | GCTTTCTCCACCTTCGCTTTCCGGTGGAAAGTCTTTCGAGCGACGGCCAGTGAATTGTAATA |
| AC9 CC deletion construct                     | P13                        | AC9 CCdel mut fwd           | AAGGAGCGCTTTCACACGCAG                                          |
|                                               | P14                        | AC9 CCdel mut rev           | GGCTGCTGCAGCCGGGTC                                             |
| AC10 promoter and full length complementation | P15                        | pUPRTKO vector fwd          | GCGGCCGCCTACCCGTAC                                             |
|                                               | P16                        | pUPRTKO vector rev          | ATGCATATGCGATGTCGAACCCCTCG                                     |
|                                               | P17                        | AC10pro-coding fwd          | gttcgacatcgcatatgcatCCCCACTCGTTCTCCTCGATG                      |
|                                               | P18                        | AC10pro-coding rev          | tcgtacgggtaggcggccgcTCTCGCCTTTAATTGCAGTACG                     |
| AC10 CC1 deletion construct                   | P19                        | AC10CC1 Q5del fwd           | CTGACGCATGCAAGTGGAC                                            |
|                                               | P20                        | AC10CC1 Q5del rev           | GTCACCGCAGGTGGCATC                                             |
| AC10 AC9-BD deletion construct                | P21                        | AC10-AC9bd Q5del fwd        | AAACTAGACGCTGAAGAC                                             |
|                                               | P22                        | AC10-AC9bd Q5del rev        | GTTATCTTCTGCACTGCC                                             |
| AC10 CC2 deletion construct                   | P23                        | AC10CC2 Q5del fwd           | GAAAGTACAGGAAGTCGTG                                            |
|                                               | P24                        | AC10CC2 Q5del rev           | ACAGACATTCGATCGTTG                                             |
| AC10 N-term deletion construct                | P25                        | AC10N-term Q5del fwd        | GGAGACACGCTCCGCAT                                              |
|                                               | P26                        | AC10N-term Q5del rev        | CATCGCAACTTCTCCTTTTTCG                                         |
| AC10 C-term deletion construct                | P27                        | AC10C-term Q5del fwd        | GCGGCCGCCGGCAAACCT                                             |
|                                               | P28                        | AC10C-term Q5del rev        | GGACTGAGCAGGTAGAAGTAAAGGGATAGAGG                               |
| AC10 N/C deletion construct                   | P29                        | pUPRTKO-AC10wt-vector-fwd   | GCGGCCGCCGGCAAACCT                                             |
|                                               | P30                        | pUPRTKO-AC10wt-vector-rev   | CATCGCAACTTCTCCTTTTTCGCAAAAAGATGTGTTCTTTC                      |
|                                               | P31                        | AC10N-Cdel fwd              | aaaaggaggaaagttgcatgCTTACGCTTAGATTTCG                          |
|                                               | P32                        | AC10N-Cdel rev              | ataggtttgccggcggccgcGGACTGAGCAGGTAGAAC                         |
| IMC12 pET28 construct for antibody production | P32                        | IMC12-pET28 fwd             | TAATAACATTGGAAGTGGATAAC                                        |
|                                               | P33                        | IMC12-pET28 rev             | TGCATTGGATTGGAAGTAC                                            |
|                                               | P34                        | IMC12-coding fwd            | tgtactccaatccaatgcaGCAACCGAGTTTCGTCGTTTC                       |
|                                               | P35                        | IMC12-coding rev            | atccactccaatgttattaCTGGGGCATGGAGTCGAC                          |
|                                               | Yeast-2-hybrid             | P36                         | f pB27* ga/PhQC [58]                                           |
| P37                                           |                            | r pB27 ga/PhQC [59]         | TCCGGCCCCGAATTCACAG                                            |
| P38                                           |                            | f pP6 3p ga/PhQC [57]       | CTCGAGTAGCTAGTGTCTAGAG                                         |
| P39                                           |                            | r pP6 5p ga/PhQC [57]       | ATTCGTGGCCCCCTGCGG                                             |
| P40                                           |                            | f AC9(D2) pb27-ga [58]      | ctggaatcggggccggaGACGTCTCCGGTTCGAGGC                           |
| P41                                           |                            | r AC9(M452*) pb27-ga        | gggcccagtgggcccttaCATTCCCTGCGGATATTCACCTCG                     |
| P42                                           |                            | f AC9(P70) blunt [61]       | CCGGCTGCAGCAGCCATTC                                            |
| P43                                           |                            | r AC9(Q113*) blunt [59]     | tcaCTGCTCTCCAAGCTTTTGAAG                                       |
| P44                                           |                            | r AC9(A157*) blunt [59]     | tcaGGCAAAGCCTTGAATGTTGAGG                                      |
| P45                                           |                            | f AC10(V2) pP6-ga [57]      | gcccagggggccacgaat GTGACTGCAGTACCCAATCCTTC                     |
| P46                                           |                            | r AC10(N650*) pP6-ga [57]   | ctagacactagctactcgag tca GTTATCTTCTGCACTGCCTTTGAC              |
| P47                                           |                            | f AC10(E651) pP6-ga [59]    | gcccagggggccacgaatGAAGACAGCACAGAGAGCCAG                        |
| P48                                           |                            | r AC10(T1300*) pP6-ga [59]  | ctagacactagctactcgagtcaGGTGTACGCGTCGCTATTC                     |
| P49                                           |                            | f AC10(S1301) pP6-ga [57]   | gcccagggggccacgaatTCCCCTTTTCAGCGGGGAG                          |
| P50                                           |                            | r AC10(R1979*) pP6-ga [57]  | ctagacactagctactcgagTCATCTCGCCTTTAATTGCAGTAC                   |
| P51                                           |                            | f AC10(K684) blunt [59]     | AAACTAGACGCTGAAGACCAGAAG                                       |
| P52                                           |                            | r AC10(R683) blunt [58]     | GCGTGGATCAAGCACCTTGG                                           |
| P53                                           |                            | r AC10(S913*) blunt [58/62] | tcaGGACTGAGCAGGTAGAAGTCTG                                      |
| P54                                           |                            | f AC10(W914) blunt [59/64]  | TGGAATACTACGTCTGTGTCGCGC                                       |
| P55                                           |                            | r AC10(C780 no*) [57/61]    | ACAGACATTCGATCGTTGCTG                                          |
| P56                                           | f AC10(E831) [57/61]       | GAAAGTACAGGAAGTCTGTCGG      |                                                                |
| P57                                           | r TgERK7(A358*) blunt [61] | tcaAGCTGTGCGGTGTCGCGC       |                                                                |
| P58                                           | f TgERK7(G359) blunt [59]  | GGTTCTTCCGGCCGCCACC         |                                                                |
